# 1           **The representational dynamics of visual objects in rapid serial visual processing streams**

2

3   Tijl Grootswagers<sup>\*a,b,c,1</sup>, Amanda K. Robinson<sup>\*a,b,c,2</sup>, Thomas A. Carlson<sup>a,b,3</sup>

4   \*equal contribution

5

6   <sup>a</sup> School of Psychology, University of Sydney, NSW, 2006, Australia

7   <sup>b</sup> ARC Centre of Excellence in Cognition and Its Disorders, NSW, 2109, Australia

8   <sup>c</sup> Department of Cognitive Science, Macquarie University, NSW, 2109, Australia

9

10   <sup>1</sup>[tijl.grootswagers@sydney.edu.au](mailto:tijl.grootswagers@sydney.edu.au) <sup>2</sup>[amanda.robinson@sydney.edu.au](mailto:amanda.robinson@sydney.edu.au) <sup>3</sup>[thomas.carlson@sydney.edu.au](mailto:thomas.carlson@sydney.edu.au)

11

## 12   **Abstract**

13   In our daily lives, we are bombarded with a stream of rapidly changing visual input. Humans have the  
14   remarkable capacity to detect and identify objects in fast-changing scenes. Yet, when studying brain  
15   representations, stimuli are generally presented in isolation. Here, we studied the dynamics of human  
16   vision using a combination of fast stimulus presentation rates, electroencephalography and multivariate  
17   decoding analyses. Using a presentation rate of 5 images per second, we obtained the representational  
18   structure of a large number of stimuli, and showed the emerging abstract categorical organisation of  
19   this structure. Furthermore, we could separate the temporal dynamics of perceptual processing from  
20   higher-level target selection effects. In a second experiment, we used the same paradigm at 20Hz to  
21   show that shorter image presentation limits the categorical abstraction of object representations. Our  
22   results show that applying multivariate pattern analysis to every image in rapid serial visual processing  
23   streams has unprecedented potential for studying the temporal dynamics of the structure of  
24   representations in the human visual system.

## 25 **Introduction**

26 The human brain can effortlessly extract abstract meaning, such as categorical object information, from  
27 a visual image, and can do so in less than 200 milliseconds (Carlson, Tovar, Alink, & Kriegeskorte, 2013;  
28 Cichy, Pantazis, & Oliva, 2014; Contini, Wardle, & Carlson, 2017; Keyzers, Xiao, Földiák, & Perrett, 2001;  
29 Mack, Gauthier, Sadr, & Palmeri, 2008; Mack & Palmeri, 2011; Potter, 1975, 1976; Potter, Wyble,  
30 Haggmann, & McCourt, 2014; VanRullen & Thorpe, 2001). The temporal dynamics of the emerging  
31 representation of visual objects has been studied extensively using multivariate decoding methods and  
32 neuroimaging methods with high temporal resolution, such as EEG and MEG. In these experiments,  
33 stimuli are generally presented with a large inter-stimulus interval (ISI) to avoid contamination from  
34 temporally adjacent stimuli, typically around one second (Carlson et al., 2013; Cichy et al., 2014;  
35 Grootswagers, Ritchie, Wardle, Heathcote, & Carlson, 2017; Isik, Meyers, Leibo, & Poggio, 2014;  
36 Kaneshiro, Guimaraes, Kim, Norcia, & Suppes, 2015). This design allows the brain to process each  
37 stimulus and avoids temporally overlapping stimulus representations. While such designs have yielded  
38 important insights into the representational dynamics of object processing, in the natural world, we are  
39 bombarded with a constant stream of changing visual input. The standard paradigm, in which stimuli are  
40 presented in isolation with a large ISI, thus may not yield the most accurate description the temporal  
41 dynamics of emerging object representations in the real world. One major advantage of multivariate  
42 decoding methods (Grootswagers, Wardle, & Carlson, 2017; Haynes, 2015) is that they allow testing for  
43 statistical dependencies in data without a resting baseline. Exploring representational dynamics using  
44 decoding and fast visual presentation rates therefore offers unique potential for investigating visual  
45 processing.

46

47 Here, we diverge from the traditional approach and propose a new method for studying the  
48 representational dynamics of human vision. It has been shown previously that stimuli presented at high  
49 presentation rates are all processed to some degree by the visual system and that their neural

50 representations can co-exist in the visual system (Marti & Dehaene, 2017; Mohsenzadeh, Qin, Cichy, &  
51 Pantazis, 2018; Rossion, Torfs, Jacques, & Liu-Shuang, 2015; Rousselet, Fabre-Thorpe, & Thorpe, 2002).  
52 Behavioural work has additionally shown that the human visual system can extract abstract information  
53 from a visual stimulus at very fast presentation rates (Crouzet, Kirchner, & Thorpe, 2010; Keyser et al.,  
54 2001; Macé, Thorpe, & Fabre-Thorpe, 2005; Mack et al., 2008; Mack & Palmeri, 2015; Marti & Dehaene,  
55 2017; Potter, 1975, 1976; Potter et al., 2014; Rossion et al., 2015; Thorpe, Fize, & Marlot, 1996). In the  
56 current study, we draw on this human capacity and study visual object recognition using fast stimulus  
57 presentation rates and multivariate decoding analyses of EEG evoked responses (Grootswagers, Wardle,  
58 et al., 2017). We used a rapid serial visual presentation (RSVP) paradigm to study the representations of  
59 a large set of 200 visual objects presented at a speed of 5 images per second (5Hz; 200ms per image).  
60 The objects were carefully selected to allow categorisation at three different levels of abstraction. The  
61 high presentation rate enabled us to obtain 40 repetitions of 200 different stimuli in a short EEG session.  
62 The increased power elicited by the faster image presentation rates allowed us to use a much larger  
63 stimulus set than previous studies, and to analyse neural responses to all distractors, rather than a  
64 single target, in the stream. We additionally examined the effect of higher level cognitive processes on  
65 the emerging representations by having participants detect targets that were identifiable based on low-  
66 level visual features or abstract categories in separate trials. In doing so, we could disentangle the  
67 temporal dynamics of visual processing and categorical abstraction of non-target stimuli from target  
68 selection processes. We successfully decoded different categorical contrasts for the 200 objects,  
69 suggesting that individual stimuli were processed up to abstract categorical representations. Strikingly,  
70 we found similar results in a follow-up experimental session, where we used a much higher presentation  
71 rate of 20 images per second (20Hz; 50ms per image). The unprecedented ability to test such large  
72 numbers of different stimuli in relatively short EEG scanning sessions shows great potential for studying  
73 the dynamics of the structure of information in the human visual system.

74

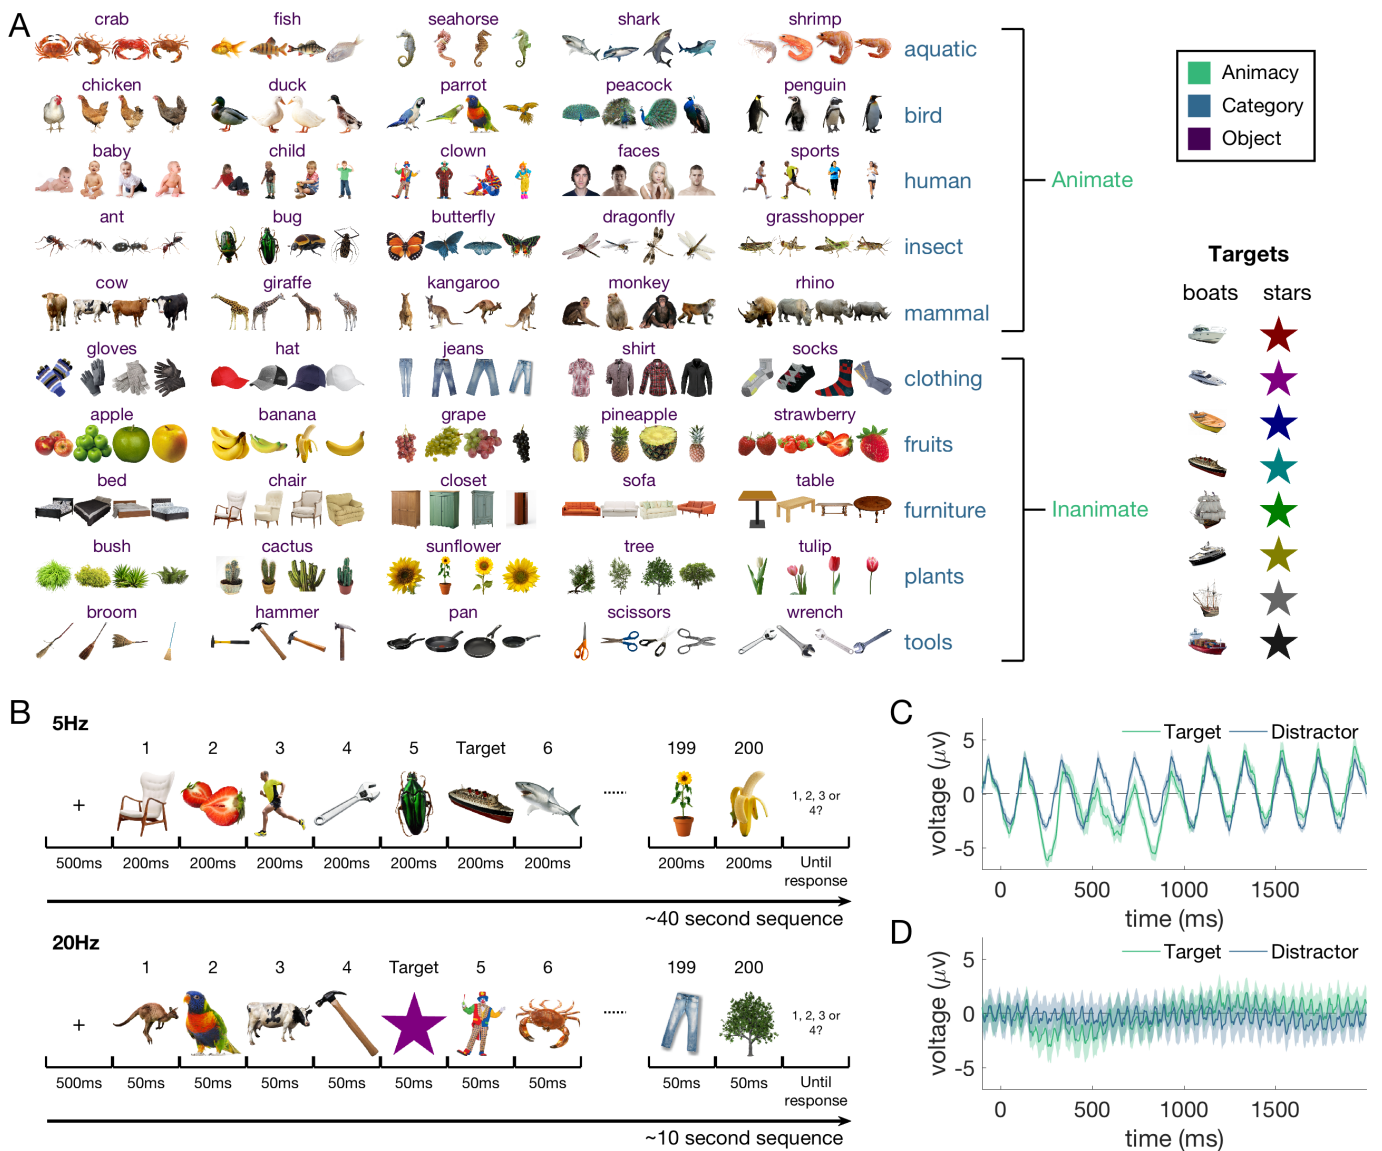

75

76 Figure 1. Stimuli and design. A) Experimental stimuli. There were 200 images of objects (obtained from  
 77 [www.pngimg.com](http://www.pngimg.com)), organised in categories at three different levels: Animacy (animate, inanimate),  
 78 category (10 categories e.g., mammal, tool, flower) and object (50 categories e.g., cow, dog, giraffe). In  
 79 the experiment, participants were asked to count the number of target objects from two categories:  
 80 boats and geometric star shapes, each with eight images. B) Experimental design. Trials consisted of all  
 81 200 images presented in random order, with 1-4 targets interspersed throughout. Images were  
 82 presented in 5Hz sequences (200ms each) in session 1, and 20Hz sequences (50ms each) in session 2.  
 83 C,D) Subject-averaged event-related potentials (ERPs) at channel Oz for target and non-target images in  
 84 the 5Hz (C) and 20Hz (D) sequences (shaded areas show the standard-error across subjects).

85

86

87

88

## 89 **Methods**

90 All stimuli and data can be found at <https://doi.org/10.17605/OSF.IO/A7KNV>.

## 91 **Stimuli**

92 We collected a stimulus set of 200 visual objects from different categories. Stimuli were obtained from  
93 the free image hosting website [www.pngimg.com](http://www.pngimg.com). The categories were manually selected, guided by  
94 categorical hierarchies described in the literature (Caramazza & Mahon, 2003; Caramazza & Shelton,  
95 1998; Carlson et al., 2013; Connolly et al., 2012; Grill-Spector & Weiner, 2014; Kiani, Esteky, Mirpour, &  
96 Tanaka, 2007; Kriegeskorte, Mur, Ruff, et al., 2008; Mahon & Caramazza, 2011; Peelen & Caramazza,  
97 2012; E. H. Rosch, 1973). There were two high level categories (animate, inanimate) consisting of 10  
98 categories (5 animate, and 5 inanimate categories). Each of these 10 categories (e.g., mammal, tool,  
99 flower) was further separated into 5 object categories (e.g., cow, dog, giraffe, etc.), which consisted of 4  
100 images each (Figure 1a). During the experiment, participants were instructed to count target stimuli  
101 (Figure 1b). To examine how attending to different features of the stimuli affected the emerging  
102 representations, we used two different sets of target stimuli. The target stimuli were either boats, or  
103 geometric star shapes, and there were eight exemplars of each target type (Figure 1 – inset). We  
104 hypothesized that detecting the star shapes among the other objects was possible using low level visual  
105 cues, while for recognising boat targets, it was necessary to process stimuli to a more abstract  
106 categorical level.

107

## 108 **Participants and experimental procedure**

109 Participants were 16 adults recruited from the University of Sydney (5 females; age range 18-38 years)  
110 in return for payment or course credit. The study was approved by the University of Sydney ethics  
111 committee and informed consent was obtained from all participants. Participants viewed 40 sequences  
112 of objects, each lasting between 40.2 - 40.8 seconds (depending on the number of targets in the  
113 sequence). In each sequence, the 200 stimuli were presented in random order, for a duration of 200ms

114 each with no gap between successive images (5Hz). In addition to the 200 stimuli, target stimuli were  
115 inserted throughout the sequence (Figure 1b). In half of the sequences, the target stimuli were boats,  
116 and in the other sequences, the target stimuli were geometric stars (Figure 1). A random number  
117 between 1 and 4 targets were presented in the sequence, with the condition that targets could not  
118 appear within the first 10 or last 10 images, and ensuring there were at least 12 non-target stimuli  
119 between subsequent targets. At the start of each sequence, participants were prompted to count the  
120 number of targets in the sequence (“Count the boats in the trial” or “Count the stars in the trial” in  
121 random order) and the 8 potential targets were shown. They were instructed to respond at the end of  
122 the sequence using a 4-way button box. After each sequence, participants received feedback. They  
123 started the next sequence with a button press. This session lasted approximately 40 minutes in total.  
124 After a short break, the second experimental session started, and participants performed another 40  
125 sequences using the same procedure as session one, except that the images were presented for only  
126 50ms (a presentation speed of 20Hz). The second session lasted about 10 minutes.

127

## 128 **EEG recordings and preprocessing**

129 Continuous EEG data were recorded using a BrainVision ActiChamp system, digitized at a 1000-Hz  
130 sample rate. The 64 electrodes were arranged according to the international standard 10–10 system for  
131 electrode placement (Oostenveld & Praamstra, 2001). During recording, all scalp electrodes were  
132 referenced to Cz. Preprocessing was performed offline using EEGLab (Delorme & Makeig, 2004). Data  
133 were filtered using a Hamming windowed FIR filter with 0.1 Hz highpass and 100Hz lowpass filters, and  
134 were downsampled to 250Hz. No further preprocessing steps were applied, and the channel voltages at  
135 each time point were used for the remainder of the analysis. Epochs were created for each stimulus  
136 presentation (except targets) ranging from [-100 to 1000ms] relative to stimulus onset. We initially had  
137 used the same range for target-distractor decoding but found that this window did not capture the full  
138 process. Therefore, for comparing targets versus distractors, we created larger epochs ranging from [-

139 100 to 2000ms] relative to the onset of a target. For each target  $t$ , we selected at random another  
140 distractor in the same sequence and created a matching epoch relative to the onset of that distractor.  
141 Choosing distractors in this way meant that the number of targets and distractors were balanced and  
142 matched per sequence (and chance level accuracy is 50%) and that the neural representations of targets  
143 and distractors were unlikely to overlap in a consistent manner. Event-related potentials (Figure 1C&D)  
144 for both the targets and non-targets exhibited clear signal at the presentation frequencies (see Figure S1  
145 for the associated scalp maps and amplitude spectra).

146

### 147 **Decoding analysis**

148 We applied an MVPA decoding pipeline (Grootswagers, Wardle, et al., 2017; Oosterhof, Connolly, &  
149 Haxby, 2016) to the EEG channel voltages, consisting of a regularised linear discriminant analysis (LDA)  
150 classifier applied in an exemplar-by-sequence-cross-validation approach. Decoding was performed  
151 within subject, and the results were analysed at the group level. This pipeline was applied to each  
152 stimulus presentation epoch in the sequence to investigate object representations in fast sequences. To  
153 investigate the temporal dynamics of target selection, we compared neural responses to targets with  
154 those to non-target distractor stimuli. Classifiers were then trained to distinguish targets from non-  
155 targets separately for the 5Hz and 20Hz sequences, and for boat and star target sequences.

156

157 We investigated object representations for the 200 non-target images using multiple categorical  
158 distinctions. First, we decoded three contrasts that impose different amounts of categorical abstraction.  
159 At the highest level, we decoded animacy (i.e., animate versus inanimate objects). The next contrast was  
160 the category tier (10 classes, e.g., mammal, insect, furniture, tool, etc.) where we decoded all 45  
161 possible pairwise combinations. The lowest categorical level was the object level (50 classes, e.g., cow,  
162 butterfly, table, hammer, etc.). Here, we decoded all 1225 possible pairwise object combinations (i.e.,  
163 cow versus butterfly, cow versus table, etc.). Finally, at the lowest level, we investigated image-level

164 representations by decoding all 19900 possible pairwise combinations of the 200 stimuli. We report the  
165 mean pairwise classification accuracies, so that chance-level accuracy for all comparisons is at 50%,  
166 which aids comparing accuracies across contrasts.

167

168 To investigate similarities in underlying object representation signals between the 5Hz and 20Hz  
169 presentations, we used a temporal generalisation approach (Carlson, Hogendoorn, Kanai, Mesik, &  
170 Turret, 2011; King & Dehaene, 2014; Meyers, Freedman, Kreiman, Miller, & Poggio, 2008). To test  
171 generalisation between the conditions, we trained classifiers on all time points in the data from the 5Hz  
172 sequences and tested them on all time points in the data from the 20Hz sequences. We repeated this  
173 for the inverse (training on 20Hz and testing on 5Hz), and averaged the resulting time-generalisation  
174 matrices (Kaiser, Azzalini, & Peelen, 2016).

175

176 All steps in the decoding analysis were implemented in CoSMoMVPA (Oosterhof et al., 2016). For the  
177 categorical contrasts that grouped more than one image, we used an image-by-sequence-cross-  
178 validation scheme so that identical images were not part of both training and test set (Carlson et al.,  
179 2013; Grootswagers, Wardle, et al., 2017). This was implemented by first splitting the data into four  
180 sets, where the first set consisted of the first images from each of the 50 object categories (i.e., cow-1,  
181 table-1 etc.), the second set of the second images (i.e., cow-2, table-2 etc.), etc. One of these sets was  
182 used as test data, and the other three as training data for the leave-one-sequence out cross-validation,  
183 where all data from one sequence was used as test data, and data from the remaining sequences as  
184 training data. For each decoding contrast, this resulted in 160 (4 images by 40 sequences) cross-  
185 validation partitions. Where image-by-sequence cross-validation was not possible (i.e., image-level and  
186 target-distractor decoding), we used a leave-one-sequence-out cross-validation scheme, where all  
187 epochs from one sequence were used as test set, resulting in 40 cross-validation partitions. We used a



188 linear discriminant analysis (LDA) classifier (implemented in CoSMoMVPA) and report the mean cross-  
189 validated decoding accuracy.

190

### 191 **Representational Similarity Analysis**

192 To study the emerging representational structure of our 200 stimuli, we analysed our data using the  
193 Representational Similarity Analysis (RSA) framework (Kriegeskorte & Kievit, 2013; Kriegeskorte, Mur, &  
194 Bandettini, 2008; Kriegeskorte, Mur, Ruff, et al., 2008), which allows comparing models of object  
195 representations. The decoding results at the image level were organised into a 200 by 200 neural  
196 representational dissimilarity matrix (RDM), which for each pair of images, contained the mean cross-  
197 validated decoding accuracy (images that evoke more dissimilar neural responses are better decodable).  
198 One neural RDM was created for each subject, and each time point (group mean RDM at 100-400ms  
199 shown in Figure 2, top row). We compared the neural RDMs to six candidate models; first, we created  
200 one model for each of the three categorical levels, grouping images from the same category (Figure 2,  
201 second row). We also used three low-level image feature control models (Figure 2, third row), which  
202 were created by correlating the vectorized experimental images. The models consisted of an image  
203 silhouette similarity model, which is based on the binary alpha layer of the stimuli and is a good  
204 predictor of differences in brain responses (Carlson et al., 2011; Teichmann, Grootswagers, Carlson, &  
205 Rich, 2018; Wardle, Kriegeskorte, Grootswagers, Khaligh-Razavi, & Carlson, 2016)), a model based on  
206 the CIELAB-colour values of the stimuli, and a model based on the difference in luminance of the stimuli.  
207 Figure 2 shows the candidate models and the correlation distance between each of the candidate  
208 models (bottom row). The small correlations between the categorical models and the low-level feature  
209 models suggests that there was little overlap between the low-level features and categorical  
210 organisations in the stimulus set. To quantify the unique contributions of all models to the neural  
211 dissimilarities, we modelled the time-varying neural RDMs of each subject as a linear combination of the  
212 candidate models using a GLM (Oosterhof et al., 2016; Proklova, Kaiser, & Peelen, 2017); for each time

213 point, the lower triangles of the neural RDM and candidate models were vectorised, and regression  
214 coefficients were obtained for all candidate models. This resulted in one beta estimate for each model,  
215 subject, and time point. We then analysed at the group level the mean beta estimates across subjects.  
216 To visualise the dynamic representational structure, at each point in time, we created a two-  
217 dimensional embedding of all 200 images. To compute the two-dimensional embedding, we applied t-  
218 SNE (Maaten & Hinton, 2008) to the mean neural RDMs. This approach finds an embedding of the multi-  
219 dimensional space in a two-dimensional representation so that the distances between points reflect  
220 their multidimensional pattern dissimilarities as best as possible.

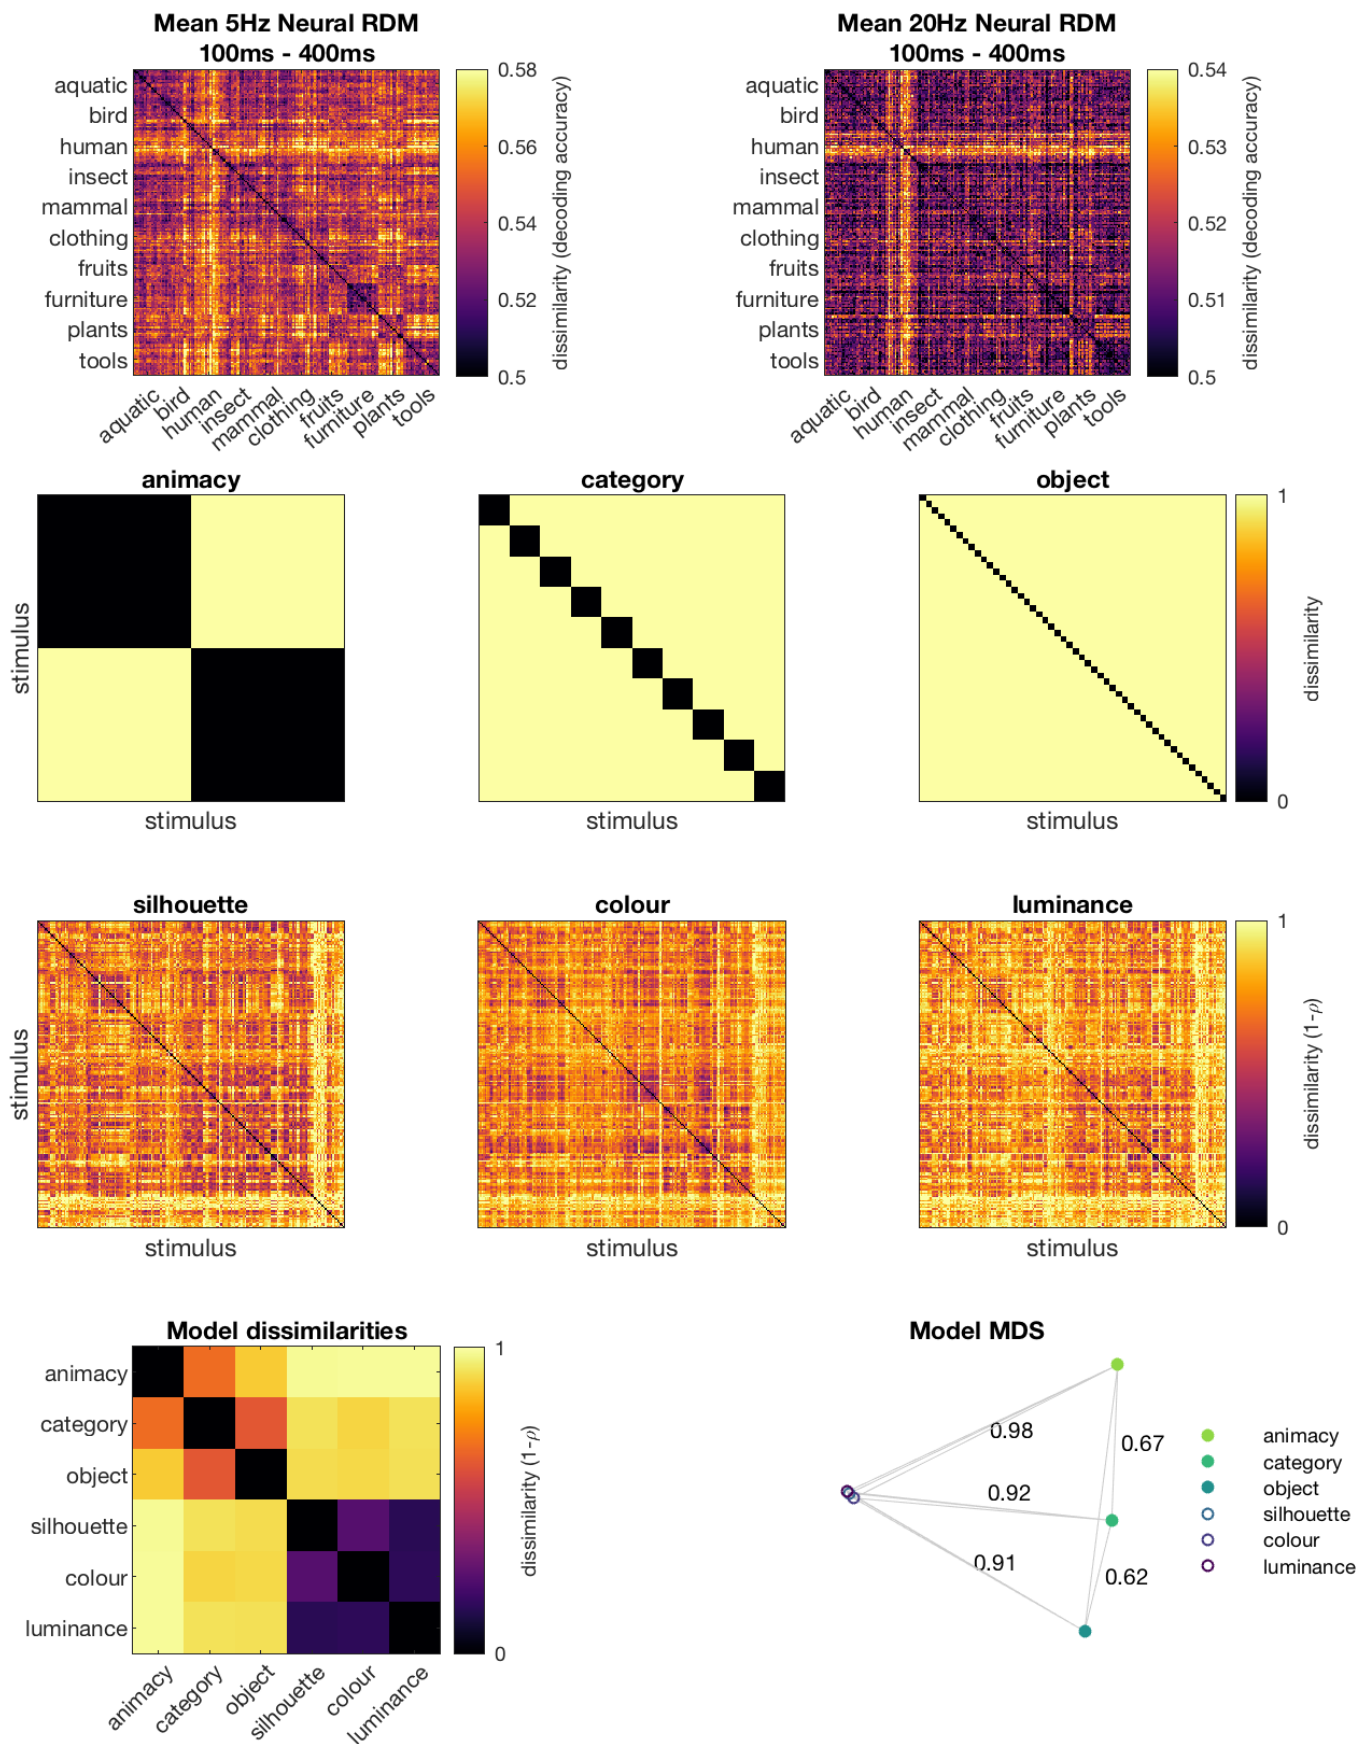

221

222 Figure 2. Candidate models used in the RSA. Top row: time-averaged neural RDMs for the 5Hz and 20Hz  
223 conditions. Each point in the 200 by 200 matrix represents the dissimilarity (here: decoding accuracy)  
224 between a pair of images. Second row: categorical models predict that responses to stimuli from the

225 same category are more similar than responses to stimuli for different categories. Third row: image  
226 properties entered the regression as control models to quantify the contribution of low-level visual  
227 differences to the neural dissimilarities. Bottom row left: dissimilarities (1-correlation) between all  
228 candidate models. The order of the images in the 200 x 200 RDMs are the same as in Figure 1. Bottom  
229 row right: model dissimilarities projected in a 2-dimensional space using classical multi-dimensional  
230 scaling, which returns a configuration so that the distance between points approximates their  
231 dissimilarities. Annotated are the dissimilarities (1-correlation) between category-animacy and category-  
232 object, and between the silhouette model and all three categorical models.

233

## 234 **Statistical inference**

235 In this study, we used Bayes factors (Dienes, 2011; Jeffreys, 1998; Rouder, Speckman, Sun, Morey, &  
236 Iverson, 2009; Wagenmakers, 2007) to determine the evidence for the null and alternative hypotheses.  
237 For the alternative hypothesis of above-chance decoding or correlation, a uniform prior was used  
238 ranging from the maximum value observed during the baseline (before stimulus onset) up to 1 (e.g.,  
239 100% decoding). For testing a non-zero difference between decoding accuracies, a uniform prior was  
240 used ranging from the maximum absolute difference observed during the baseline up to 50% (0.5). We  
241 then calculated the Bayes factor (BF) which is the probability of the data under the alternative  
242 hypothesis relative to the null hypothesis. We thresholded  $BF > 3$  and  $BF > 10$  as substantial and strong  
243 evidence for the alternative hypothesis, and  $BF < 1/3$  and  $BF < 1/10$  for substantial/strong evidence in  
244 favour of the null hypothesis (Jeffreys, 1998; Wetzels et al., 2011). BF that lie between 1/3 and 3  
245 indicate insufficient evidence for either hypothesis.

246

## 247 **Results**

248 We examined the representational dynamics of 200 different visual objects (Figure 1A), presented in  
249 5Hz and 20Hz sequences (Figure 1B) using EEG. During the sequences, participants detected targets  
250 (boats or stars).

251

## 252 **The effect of target type and target selection**

253 Participants were generally above chance (25%) at detecting targets (boats or stars) in the 5Hz and 20Hz  
254 sequences (Figure 3A-B). There was no difference in performance between the boat and star conditions  
255 (all BF < 1/3). On incorrect trials, responses often differed no more than one from the correct answer  
256 (Figure 3, right columns). This indicates that in general, participants missed at most one target when  
257 they responded incorrectly.

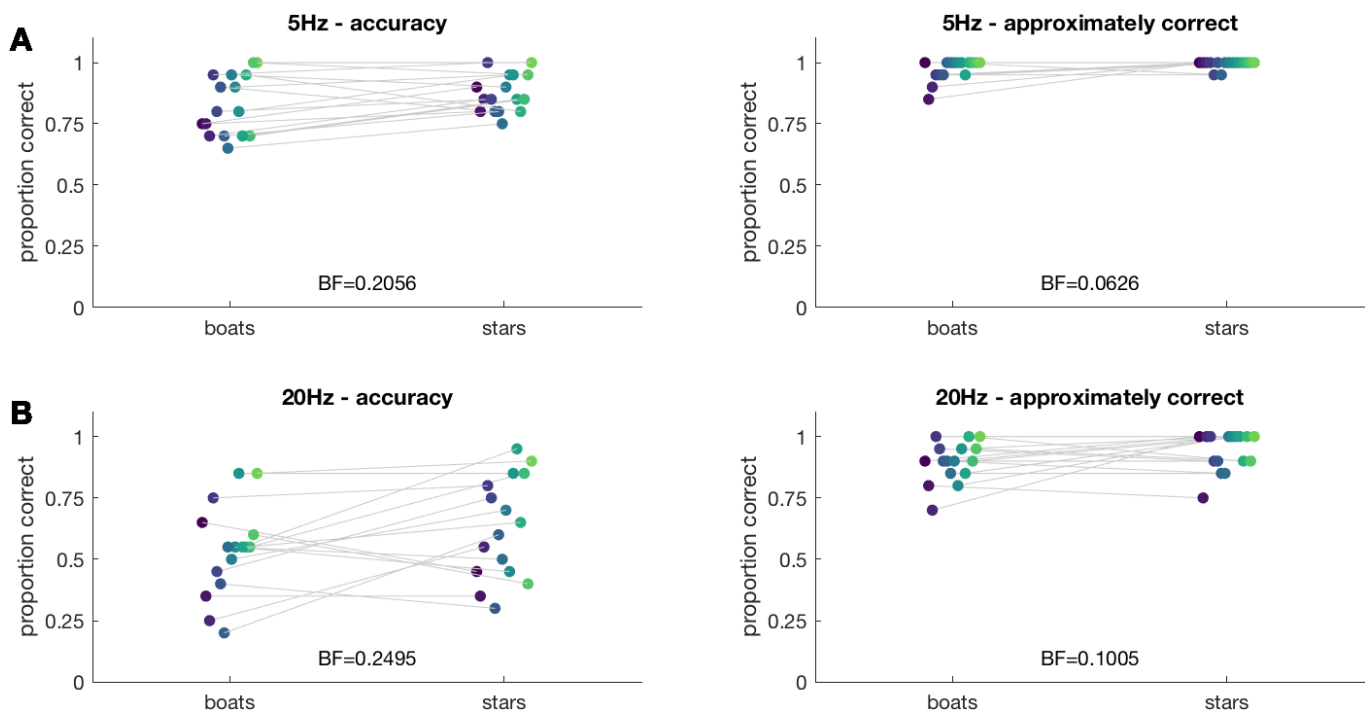

258  
259 Figure 3: Behavioural results of target detection performance. (A) 5Hz sequences. (B) 20Hz sequences.  
260 Left columns show the mean proportion of correct responses for each participant separately for boat  
261 target sequences and star target sequences. Right columns show the mean approximately-correct (i.e.,  
262 response differed by at most 1 from the correct answer) accuracy for each participant. Bayes Factors  
263 (BF) comparing mean accuracies between the boat and star sequences are listed above the x-axis.  
264

265

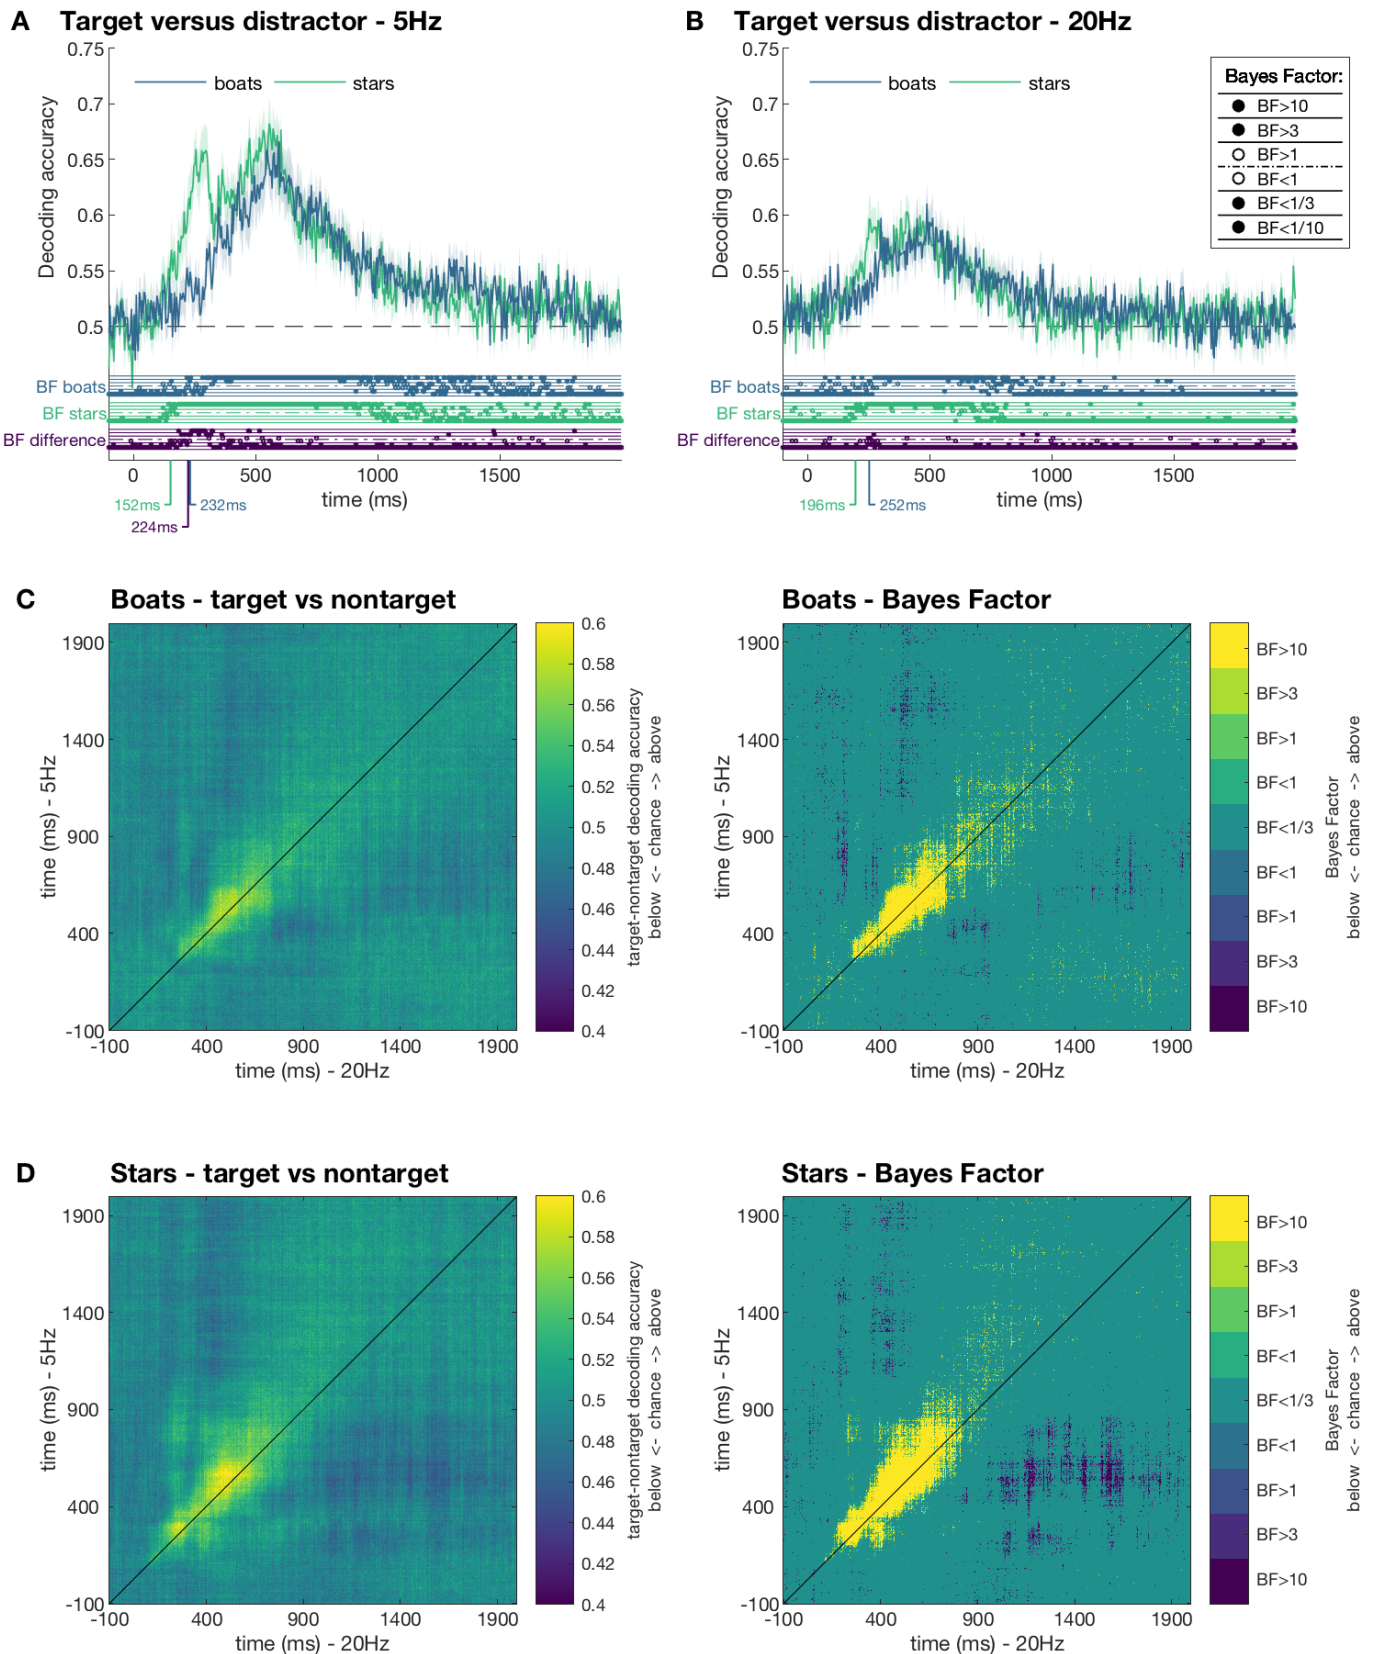

266

267 Figure 4. Decoding target versus distractor. For each target, a distractor was randomly selected from the  
 268 same sequence, and classifiers were trained on target versus distractor. A-B) Plots show the mean leave-  
 269 one-sequence-out cross-validated accuracy for the 5Hz condition (A), and the 20Hz condition (B).  
 270 Shaded areas show the standard error of the mean across participants. Results are shown separately for  
 271 boat target sequences and star target sequences. Dots below plots indicate thresholded Bayes Factors

272 (BF, see inset) for the boat (top row) and star (middle row) sequences compared to chance and for the  
273 difference between boat and star sequences (bottom row). Annotated below the x-axis are the time  
274 points where the BF first exceeded 3 (for at least 2 consecutive time points). C-D) temporal  
275 generalisation results. The left columns show classifier generalisation performance for the boat (C) and  
276 star (D) between the different presentation durations. The right columns show corresponding  
277 thresholded Bayes Factors (yellow indicating above chance, and blue indicating below chance decoding).  
278 Higher than chance generalisation (yellow) on the diagonal indicates similar temporal dynamics of  
279 processing in the 5Hz condition as the 20Hz condition.

280

281 The temporal dynamics of target selection were revealed by decoding targets from non-targets. The  
282 time-varying mean target-distractor decoding accuracy was computed separately for boat sequences  
283 and star sequences (Figure 4). Target-distractor decoding performance peaked around 67% in the 5Hz  
284 condition (Figure 4A), and around 60% in the 20Hz condition (Figure 4B). For both presentation rates,  
285 peak decoding performance was around 500ms. In both conditions, decoding for star targets was above  
286 chance earlier than for boats, which suggests that stars targets were easier to distinguish overall.  
287 Decoding performance remained above chance for over 1000 ms in the 5Hz sequences, and for  
288 approximately 800 ms in the 20Hz sequences.

289

290 The temporal generalisation approach revealed target selection was very similar between the 5Hz and  
291 20Hz sequences. For both boat and star target sequences, the onset of target decoding occurred around  
292 the same time, and cross-decoding was most evident along the diagonal, suggesting that target  
293 selection processes occurred at the same latencies regardless of the sequence speed and image  
294 duration (Figure 4c-d).

295

### 296 **Decoding categorical contrasts of 200 stimuli**

297 In the 5Hz condition, we observed above chance decoding for all categorical levels (Figure 5, blue lines),  
298 starting at 100ms after stimulus onset for the categorical levels, and earlier (80ms) at the image level.  
299 This difference may be caused by decodable low-level visual features at the image level, which are

300 controlled for by the exemplar-cross-validation approach at the categorical levels (Carlson et al., 2013;  
301 Grootswagers, Wardle, et al., 2017). These decoding onsets correspond well to the existing decoding  
302 literature, which has reported onsets for various categories between 80ms and 100ms (Carlson et al.,  
303 2013; Cichy et al., 2014; Kaneshiro et al., 2015). For the animacy level, the results showed three distinct  
304 peaks in decoding performance (150, 200ms and 400ms). In contrast, peak decoding happened around  
305 200ms for category and object decoding and 130ms for image decoding. For all categorical levels,  
306 above-chance decoding was sustained until around 500ms. Note that at 500ms, there were already two  
307 new stimuli presented.

308

309 In the 20Hz condition (Figure 5, green lines), we again observed above-chance decoding for all levels.  
310 Notably, the onset of decoding was around the same time point as in the 5Hz condition and subsequent  
311 decoding followed the same trajectory but diverged later in the time series (indicated by the bottom  
312 row of Bayes factors). The overall peak decoding performance was lower, and the peak decoding time  
313 points appeared earlier in the time series. Decoding for all comparisons except object decoding  
314 remained above chance until around 300ms, which included five subsequent stimulus presentations.  
315 There was no difference between distractor processing on boat target and star target trials ( $BF < 1/10$ )  
316 for all categorical contrasts.

317

318 Temporal generalisation analyses were performed to compare categorical decoding between the 5Hz  
319 and 20Hz conditions. For all three categorical levels, we observed similar onsets between presentation  
320 durations, but longer subsequent processing for the 5Hz condition relative to the 20Hz condition (Figure  
321 6). Notably, for the animacy distinction there was no evidence of generalisation between the 5Hz  
322 sequence around 500-600ms and the 20Hz sequence at any time point, despite a difference between  
323 decoding accuracies during this time period (as was seen in Figure 5). This suggests that a high-level  
324 animacy-related process was present in the 5Hz condition but absent in the 20Hz condition. The



325 temporal generalisation analyses also showed consistent below chance generalisation between the  
326 early and late responses. This phenomenon is consistent with previous decoding studies on visual object  
327 categorisation (Carlson et al., 2013; Cichy et al., 2014), and has been suggested to be caused by the  
328 stimulus offset, or by an adaptation or inhibition signal (Carlson et al., 2011, 2013; Contini et al., 2017).  
329

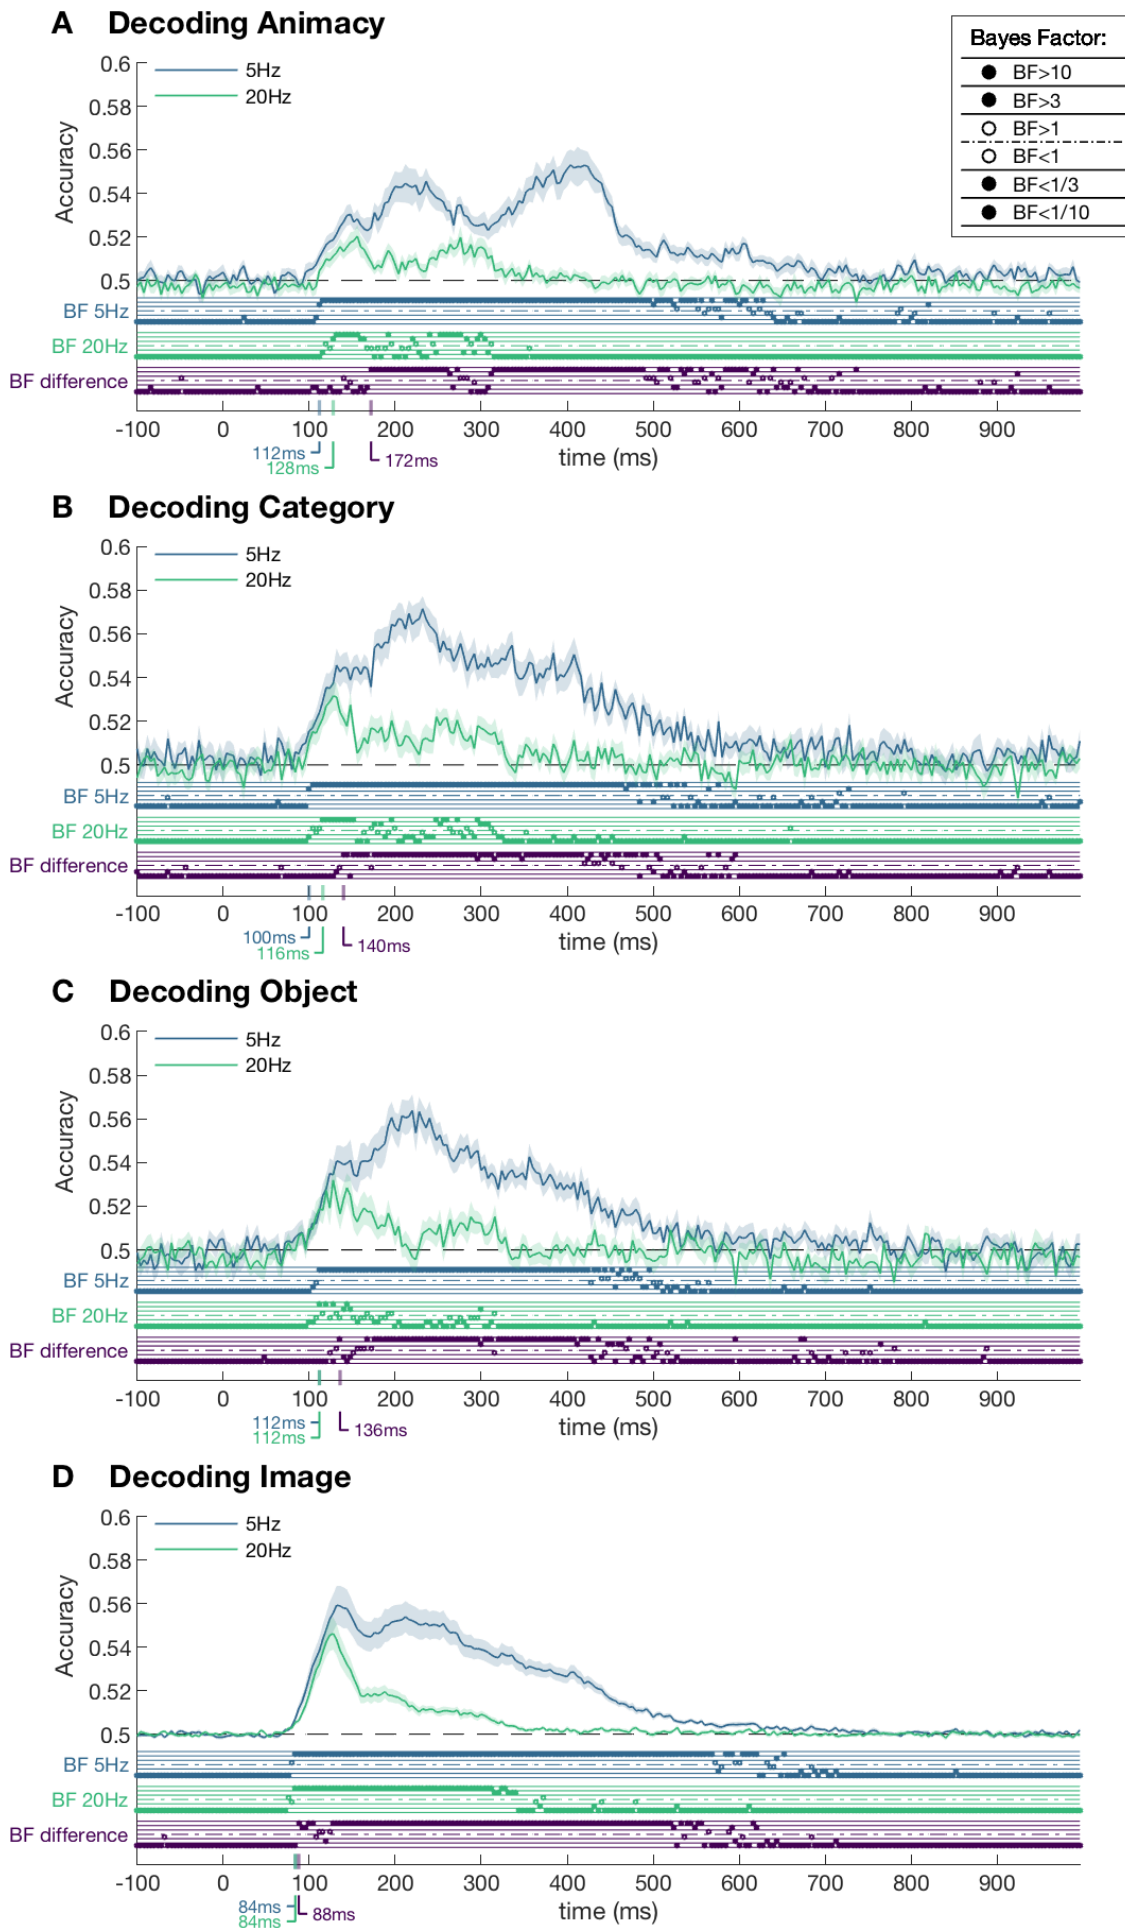

331 Figure 5. Mean decoding accuracy for 5Hz and 20Hz conditions. A) Decoding animacy (animate versus  
332 inanimate). B) Mean pairwise decoding for the 10 categories (e.g., mammal, tools). C) Mean pairwise  
333 decoding for 50 object categories (e.g., dog, giraffe). D) Mean pairwise decoding for all 200 images.  
334 Shaded areas depict standard error of the mean across subjects. Dots below plots indicate thresholded  
335 Bayes Factors (BF, see inset) for the 5Hz condition compared to chance (top rows), 20Hz condition  
336 compared to chance (middle rows) and for the difference between the 5Hz and 20Hz results (bottom  
337 rows). The time points where the BF first exceeded 3 are annotated below the x-axis.  
338

339

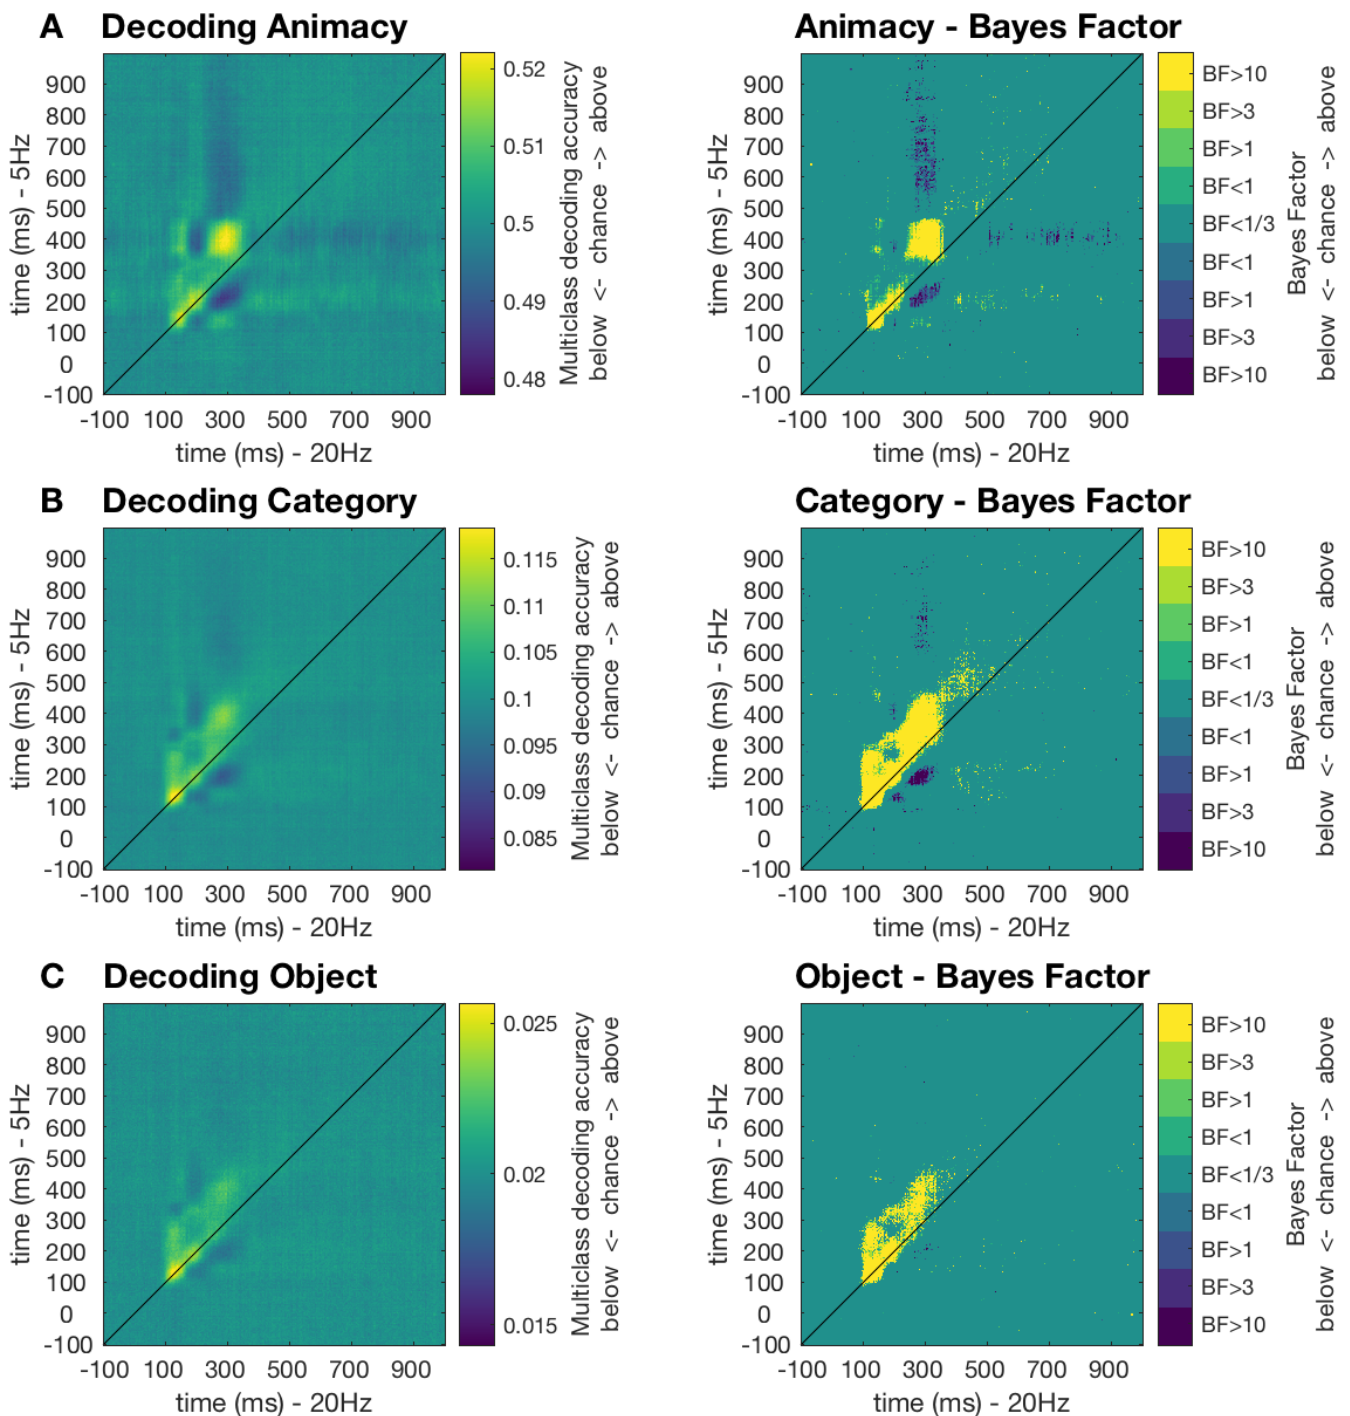

340

341 Figure 6. Temporal generalisation results. A) Decoding animacy (animate versus inanimate; chance =  
342 50%). B) Decoding 10-way category (e.g., mammal, tools; chance = 10%). C) Decoding 50-way object  
343 categories (e.g., dog, giraffe; chance = 2%). The left columns show classifier generalisation performance  
344 for the three categorical levels between the different presentation durations. The right columns show  
345 corresponding thresholded Bayes Factors (Yellow indicating above chance, and blue indicating below  
346 chance decoding). Higher than chance generalisation (yellow) above the diagonal indicates slower  
347 processing in the 5Hz condition relative to the 20Hz condition.  
348

### 349 **Representational dynamics of 200 stimuli**

350 Emerging representational structures of the 200 stimuli were studied in the Representational Similarity  
351 Analysis (RSA) framework (Kriegeskorte & Kievit, 2013; Kriegeskorte, Mur, & Bandettini, 2008;  
352 Kriegeskorte, Mur, Ruff, et al., 2008). A neural representational dissimilarity matrix (neural RDM) was  
353 created for each subject, and each time point containing the dissimilarities between all 200 stimuli.  
354 Neural RDMs were modelled as a linear combination of six candidate models; low-level image  
355 silhouette, colour and luminance models, and one model for each of the three categorical levels. We  
356 then analysed the mean beta estimates of the candidate models (Figure 7). For both presentation rates,  
357 the silhouette model captured the early response in the data, followed by the colour, object, and  
358 category models. These results quantify the contribution of low-level visual features to neural  
359 dissimilarities. While low-level features were represented early in the signal, the categorical models also  
360 explained unique variance in the data. In the 5Hz condition, the animacy model emerged last, while in  
361 the 20Hz sequences the animacy model did not explain variance in the neural RDM at any time point. To  
362 visualise and qualitatively explore the dynamic representational structure, we created RDMs and a two-  
363 dimensional embedding of all 200 images from 5Hz and 20Hz sequences. Figure 8 shows these  
364 embeddings for 5Hz at two time points, 200 and 400ms, which are the time points where the category  
365 and animacy models were represented strongest in the signal (as observed in Figure 7). In these  
366 embeddings, the distance between images reflects their mean dissimilarity across subjects (Figure 8; see  
367 supplementary material for neural RDMs and two-dimensional embedding for 5Hz and 20Hz at all time  
368 points).

369

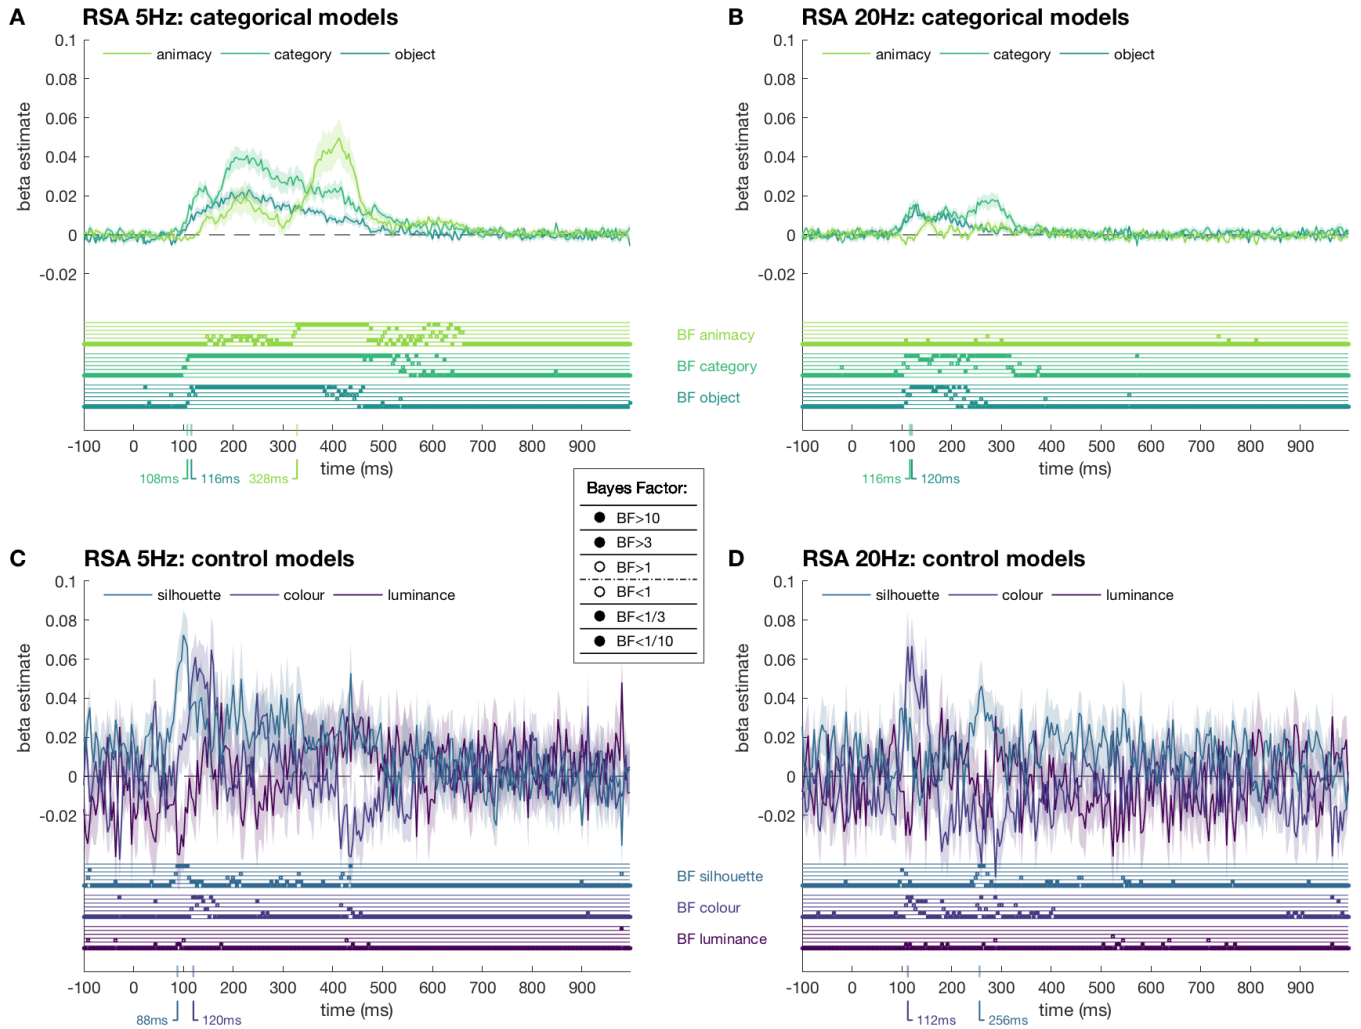

370

371 Figure 7. RSA model tests. A) 5Hz categorical models. B) 20Hz categorical models. C) 5Hz image feature  
 372 control models. D) 20Hz image feature control models. The neural RDMs of each subject were modelled  
 373 as linear combination of six candidate models: three categorical models and three image feature  
 374 models. Lines show estimated betas for the models. Shaded areas reflect the standard error across  
 375 subjects. Dots below plots indicate the thresholded Bayes Factors (BF, see inset) for each beta estimate.  
 376 Annotated below the x-axis are the time points where the BF first exceeded 3 (for at least 2 consecutive  
 377 time points).

378

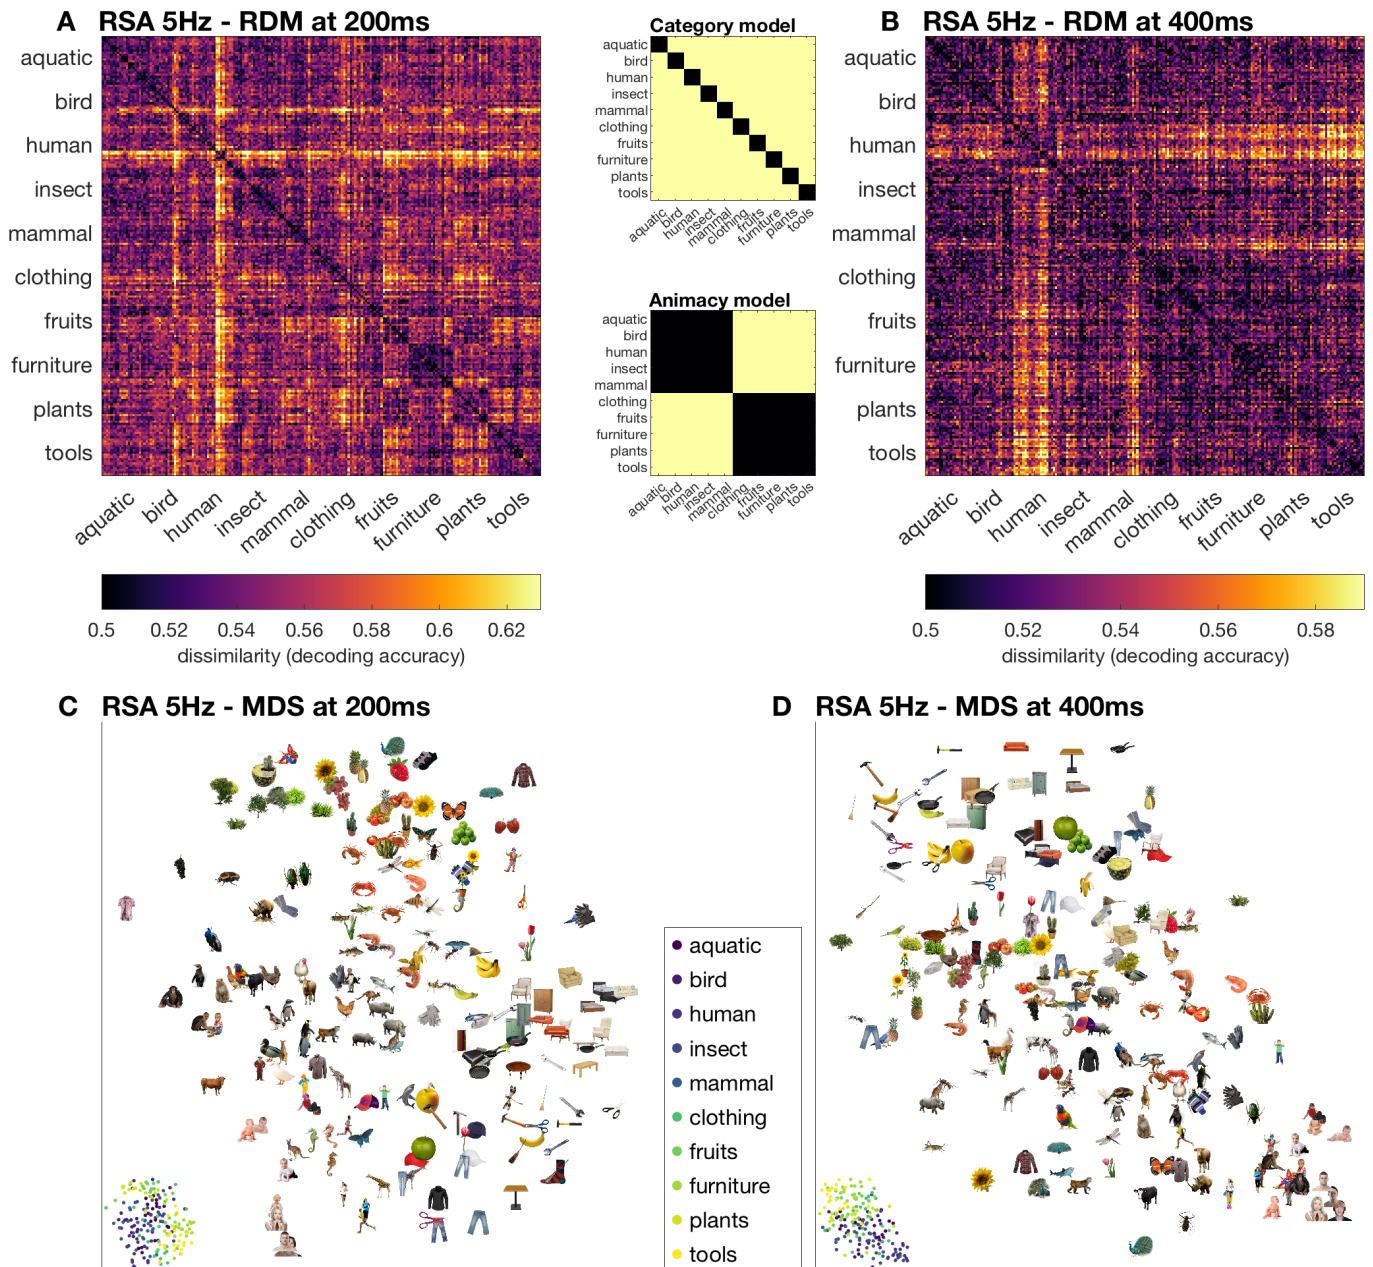

379

380 Figure 8. Representational structure of images in 5Hz sequences at two time points. A) Neural  
 381 dissimilarity matrix at 200ms. B) Neural RDM at 400ms. The RSA model testing (Figure 7) showed that  
 382 the structure at 200ms best resembles the category model and structure at 400ms best resembles the  
 383 animacy model. C) Embedding of stimuli in a two-dimensional space reflects their pairwise distances at  
 384 200ms. D) Embedding at 400ms. Stimuli that are shown further apart in this representation evoked  
 385 more dissimilar neural responses. In the bottom left corner of each plot, the same arrangement is  
 386 shown, with images represented by dots coloured according to the 10 categories (see inset).  
 387

## 388 **Discussion**

389 In the current study, we characterised the representational dynamics of a large number of images in fast  
390 presentation sequences. Previous work has used MEG and EEG decoding to investigate representations  
391 of much smaller image sets using slow image presentation paradigms (Carlson et al., 2013; Cichy et al.,  
392 2014; Contini et al., 2017; Grootswagers, Ritchie, et al., 2017; Kaiser et al., 2016; Kaneshiro et al., 2015;  
393 Proklova et al., 2017; Ritchie, Tovar, & Carlson, 2015; Simanova, van Gerven, Oostenveld, & Hagoort,  
394 2010); here we extend this work by looking at the representations of 200 objects during RSVP using  
395 standard 64-channel EEG. For 5Hz and 20Hz sequences, all 200 images could be decoded at four  
396 different categorical levels. Furthermore, neural responses to targets were distinct from those to  
397 distractor stimuli. Above-chance decoding outlasted subsequent image presentations, supporting the  
398 idea that multiple object representations can co-exist in the visual system at different stages of  
399 processing (Marti & Dehaene, 2017). In keeping with the known hierarchical nature of the visual system,  
400 RSA model testing suggested neural responses relied on low-level visual features early in the time series,  
401 and subsequent processing was associated with increasing category abstraction (Carlson et al., 2013;  
402 Cichy et al., 2014). Overall, we show the unprecedented ability of the human brain to process images  
403 when pushing the limits of temporal perception.

404

405 Target decoding results revealed that neural responses to distractors diverged from star target  
406 responses much earlier than boat targets. This supports our initial hypothesis that star targets would be  
407 distinct from other images based on low-level visual features, unlike boat targets. The behavioural  
408 results, however, revealed target detection did not differ across boat and star trials, indicating that  
409 there was no “pop-out” effect of stars. This is despite anecdotal reports that participants found the star  
410 targets easier. Target versus distractor decoding for boats and stars peaked at 500ms, supporting  
411 previous evidence that high level cognitive processes mediate temporal selection (Marti & Dehaene,  
412 2017; Sergent, Baillet, & Dehaene, 2005). These results suggest that distinguishable low-level features

413 do not help with target detection in RSVP sequences, at least in the current design with such high  
414 variation in distractor images.

415

416 Target processing did not differ markedly across the different experimental durations. In both the 5Hz  
417 and 20Hz sequences, targets could be distinguished from distractors for a long period of time, but this  
418 was exaggerated for the 5Hz condition, where decoding was above chance for over 1000ms, compared  
419 to 800ms in the 20Hz condition. Decoding was also higher in the 5Hz condition relative to the 20Hz  
420 condition, but the dynamics of temporal selection processes were largely the same. The time of peak  
421 decoding (500ms) was the same for both conditions, and time generalisation analyses revealed neural  
422 processes occurred at the same latency in both conditions. This suggests that processes of target  
423 selection are largely the same regardless of image presentation duration and frequency. Notably, target  
424 processing was much more prolonged than categorical decoding for distractors, again indicative of  
425 higher level cognitive processes at play for target detection. Note that the current experimental design  
426 did not allow us to see which targets in the stream were missed, but effects are likely to be amplified for  
427 correctly detected targets. Indeed, Marti & Dehaene (2017) found that late responses were sustained  
428 for reported stimuli. Taken together, our results show that late target-related responses do not differ  
429 dramatically in faster sequences relative to slower sequences.

430

431 Neural responses to the 200 non-task-relevant (distractor) objects are indicative of fairly automatic early  
432 visual processing and divergence at later processing stages according to image duration. For all  
433 contrasts, image presentation duration and cognitive task set did not influence the earliest processing  
434 stages. When looking at decoding for the durations separately, onsets seemed to be earlier for the 5Hz  
435 than 20Hz conditions, in accordance with recent work showing earlier onsets for longer image durations  
436 (Mohsenzadeh et al., 2018). It is important to note, however, that higher signal strengths can also lead  
437 to earlier decoding onsets (Grootswagers, Wardle, et al., 2017), thus differences between onsets must



438 be interpreted with caution in the context of larger peak decoding. Crucially, here Bayes factors  
439 revealed evidence for no difference in decoding at these early time points between the 5Hz and 20Hz  
440 image sequences (<150ms from image onset). Results from the temporal generalisation approach  
441 supported this view, by showing that initial processing stages occurred at the same time for the 5Hz and  
442 20Hz sequences, as seen by the above-chance decoding on the diagonal in Figure 5. Finally, for the three  
443 categorical levels (animacy, category and object), Bayesian analyses revealed distractor processing did  
444 not differ between boat and star trials. These results suggest that initial neural responses to all visual  
445 stimuli were similar regardless of their presentation duration.

446

447 Previous work has shown that, using MEG, it is possible to use decoding to investigate target-related  
448 processes in RSVP streams (Marti & Dehaene, 2017; Mohsenzadeh et al., 2018a). For example,  
449 Mohsenzadeh et al. used 306-channel MEG to decode 12 target faces from 12 non-target objects in  
450 RSVP streams, analysing only the middle image in the stream to study feedforward versus feedback  
451 processes. As part of a study investigating temporal selection mechanisms, Marti & Dehaene showed  
452 that a classifier trained on 5 categories using a separate localiser could generalise to distractor items  
453 around the target. In contrast to these studies, here we decoded object representations using a 64-  
454 channel EEG, a much larger set of images (200) in a sequence, and no separate localiser. The results  
455 from our approach also corroborated previous work decoding the representations of objects presented  
456 in isolation (Carlson et al., 2013; Cichy et al., 2014; Kaneshiro et al., 2015). Our results showed that  
457 decoding objects in RSVP streams have similar decoding onsets as previously reported (Carlson et al.,  
458 2013; Cichy et al., 2014; Kaneshiro et al., 2015). This validates the RSVP approach as a method to study  
459 representational dynamics. We further found that the 20Hz condition limited visual processing  
460 compared to 5Hz, which shows that this paradigm can be utilised to bias the extent of visual processing  
461 at different image presentation rates. In sum, our results confirm that long ISIs are not necessary for  
462 multivariate analyses. This thus allows analysing all presentations in an RSVP sequence, rather than

463 limiting the scope to selected presentations (e.g., targets) in the streams. Here we have demonstrated  
464 the potential by studying the representational dynamics of 200 objects in one short EEG session. Future  
465 work can adopt similar approaches to investigate for example prediction, priming, masking, or  
466 attentional effects on the processing of distractors in RSVP sequences.

467

468 Despite similar early processing stages, later processing diverged according to image presentation  
469 duration. Representations during 5Hz sequences were stronger and lasted longer than those during  
470 20Hz sequences, and temporal generalisation analyses showed that processes were prolonged for the  
471 5Hz relative to the 20Hz condition. It could be that longer image durations allow more consolidation,  
472 potentially due to recurrent processing. It is also possible that longer durations allow time to reach  
473 some kind of threshold, which triggers further processing. Note that image duration and ISI are  
474 conflated in this design, so we cannot conclude whether or if stronger and longer processing occurs due  
475 to longer image presentation or due to delayed masking from the next stimulus. Future work can build  
476 on this approach to investigate the temporal limits of visual perception.

477

478 The RSA regression analyses provided insight into the differences in processing between the 5Hz and  
479 20Hz sequences. The category decoding analyses were performed using a leave-one-exemplar out cross-  
480 validation approach, which means that the classifier always had to generalise to new images, reducing  
481 the likelihood that low-level features would drive the results. However, there can still be consistent low-  
482 level features between the categories that can contribute to classification. The regression RSA technique  
483 aimed to dissociate the unique contributions of each of the categorical and low-level featural models. In  
484 accordance with the decoding results, processes early in the time series (~100-150ms) were mostly  
485 explained by the low-level silhouette model and then the colour model for the 5Hz and 20Hz conditions  
486 (Carlson et al., 2011). Subsequent processing, however, elucidated the differential contributions of the  
487 different categorical contrasts, and how this varied for the different image durations. For the 5Hz

488 condition, the category model appeared to have the largest unique contribution around 200ms, and the  
489 animacy model accounted for the most variance at about 400ms, indicating that increasing category  
490 abstraction occurred at higher levels of visual processing (Carlson et al., 2013; Cichy et al., 2014; Contini  
491 et al., 2017; Kriegeskorte, Mur, Ruff, et al., 2008). In contrast, the animacy model had no unique  
492 contribution to the signal for the in 20Hz sequences. The time course of the animacy model regression  
493 for the 5Hz condition (>350ms) suggests that the animate-inanimate difference might exclusively  
494 account for the prolonged decoding in the 5Hz condition relative to the 20Hz condition. This could imply  
495 that a high-level animacy effect requires sufficient evidence accumulation to proceed, which does not  
496 happen at 20Hz presentation rates. The finding that longer image presentations allow higher level  
497 processing is supported by steady-state visual evoked potential (SSVEP) work showing that images  
498 presented at faster frequencies are biased towards earlier visual processes in contrast to slower  
499 frequencies which allow higher level processing (Collins, Robinson, & Behrmann, 2018).

500

501 When qualitatively inspecting the visualisation of the representational structure (Figure 8), we noticed a  
502 clear categorical organisation in the 5Hz presentation condition. At 200ms in the response, the structure  
503 reflected mostly natural versus artificial, with plants, fruits and animals all clustering on one side (Figure  
504 8C). In line with the decoding and RSA results, the structure at 400ms showed a clear animate –  
505 inanimate distinction (Figure 8D) (Caramazza & Shelton, 1998), which is commonly observed in neural  
506 responses in the ventral temporal cortex (Cichy et al., 2014; Konkle & Caramazza, 2013; Kriegeskorte,  
507 Mur, Ruff, et al., 2008; Proklova, Kaiser, & Peelen, 2016) and has been shown to match human  
508 categorisation behaviour well (Bracci & Op de Beeck, 2016; Carlson, Ritchie, Kriegeskorte, Durvasula, &  
509 Ma, 2014; Grootswagers, Cichy, & Carlson, 2018; Mur et al., 2013; Ritchie, Tovar, & Carlson, 2015). In  
510 the animate – inanimate organisation primates were located at the far end of the animate side, which  
511 may reflect a continuum of biological classes in the brain (Connolly et al., 2012; Sha et al., 2015) or  
512 typicality (Grootswagers, Ritchie, et al., 2017; Jordan, Greene, Beck, & Fei-Fei, 2016; Posner & Keele,

513 1968; E. H. Rosch, 1973; E. Rosch & Mervis, 1975). No animacy structure was apparent for the 20Hz  
514 condition (as evidenced by the RSA results), but rather individual categorical clusters seem to have  
515 emerged (in line with the RSA results), such as human faces, and, later, humans and primates as a  
516 category (see Supplementary Material). Interestingly, in these visualisations gloves were grouped with  
517 humans and primates, which could mean they were perceived as body parts, rather than inanimate  
518 objects. While these visualisations allow for such qualitative speculation, the quantitative RSA modelling  
519 results highlight the level of detail in the representation structure that can be obtained using EEG  
520 decoding and fast presentation rates. Here, we used a common 64-channel EEG, but future work can  
521 use this approach in combination with high-density EEG or other neuroimaging methods that are  
522 sensitive to finer spatial patterns, such as MEG.

523

524 One remaining question is the role that low-level image statistics play in our results. The RSA approach  
525 showed that low-level control models explained early neural responses to the stimuli. The current  
526 stimulus set consisted of segmented coloured objects, which were not matched on low-level features  
527 such as colour, orientation, shape, and size. Future work can build on the current paradigm using a  
528 stimulus set that for example contains orthogonal shape and category dimensions (Bracci, Kalfas, & Op  
529 de Beeck, 2017; Bracci & Op de Beeck, 2016; Proklova et al., 2017, 2016), or test the decodability of  
530 these features using for example texture stimuli with similar features (Long, Konkle, Cohen, & Alvarez,  
531 2016; Long, Yu, & Konkle, 2017). Such extensions can help unravel the relationship between object  
532 features and categories, and increase our understanding of how this inherent relationship guides  
533 categorical abstraction in the visual system.

534

535 In conclusion, our results show that we can study the representational dynamics of more than 200  
536 objects in one short EEG session. We were able to characterise the time courses of multiple categorical  
537 contrasts from the same images, indicating that all objects reached abstract categorical stages of

538 perception despite being presented for short durations. Here, we took advantage of the high temporal  
539 resolution of both the human visual system and common neuroimaging techniques such as EEG and  
540 MEG. These results confirm that long ISIs are not necessary for multivariate analyses, as they do not  
541 require a resting baseline as in ERP analyses. Thus, future MVPA studies on visual perception should  
542 consider using fast presentation rates as this allows for a substantial increase of the number of  
543 presentations, stimuli, or experimental conditions. This offers unprecedented potential for studying the  
544 temporal dynamics of visual perception and attention.

545

#### 546 **Acknowledgements**

547 We thank Nick McNair for assisting with data collection. This research was supported by an Australian  
548 Research Council Future Fellowship (FT120100816) and an Australian Research Council Discovery  
549 project (DP160101300) awarded to T.A.C. The authors acknowledge the University of Sydney HPC  
550 service for providing High Performance Computing resources. The authors declare no competing  
551 financial interests.

552

553 **References**

554

555 Bracci, S., Kalfas, I., & Op de Beeck, H. P. (2017). The ventral visual pathway represents animal  
556 appearance over animacy, unlike human behavior and deep neural networks. *BioRxiv*, 228932.

557 <https://doi.org/10.1101/228932>

558 Bracci, S., & Op de Beeck, H. P. (2016). Dissociations and Associations between Shape and Category  
559 Representations in the Two Visual Pathways. *Journal of Neuroscience*, 36(2), 432–444.

560 <https://doi.org/10.1523/JNEUROSCI.2314-15.2016>

561 Caramazza, A., & Mahon, B. Z. (2003). The organization of conceptual knowledge: the evidence from  
562 category-specific semantic deficits. *Trends in Cognitive Sciences*, 7(8), 354–361.

563 [https://doi.org/10.1016/S1364-6613\(03\)00159-1](https://doi.org/10.1016/S1364-6613(03)00159-1)

564 Caramazza, A., & Shelton, J. R. (1998). Domain-Specific Knowledge Systems in the Brain: The Animate-  
565 Inanimate Distinction. *Journal of Cognitive Neuroscience*, 10(1), 1–34.

566 <https://doi.org/10.1162/089892998563752>

567 Carlson, T. A., Hogendoorn, H., Kanai, R., Mesik, J., & Turret, J. (2011). High temporal resolution  
568 decoding of object position and category. *Journal of Vision*, 11(10), 9.

569 <https://doi.org/10.1167/11.10.9>

570 Carlson, T. A., Ritchie, J. B., Kriegeskorte, N., Durvasula, S., & Ma, J. (2014). Reaction Time for Object  
571 Categorization Is Predicted by Representational Distance. *Journal of Cognitive Neuroscience*,

572 26(1), 132–142. [https://doi.org/10.1162/jocn\\_a\\_00476](https://doi.org/10.1162/jocn_a_00476)

573 Carlson, T. A., Tovar, D. A., Alink, A., & Kriegeskorte, N. (2013). Representational dynamics of object  
574 vision: The first 1000 ms. *Journal of Vision*, 13(10), 1. <https://doi.org/10.1167/13.10.1>

575 Cichy, R. M., Pantazis, D., & Oliva, A. (2014). Resolving human object recognition in space and time.

576 *Nature Neuroscience*, 17(3), 455–462. <https://doi.org/10.1038/nn.3635>

- 577 Collins, E., Robinson, A. K., & Behrmann, M. (2018). Distinct neural processes for the perception of  
578 familiar versus unfamiliar faces along the visual hierarchy revealed by EEG. *NeuroImage*, *181*,  
579 120–131. <https://doi.org/10.1016/j.neuroimage.2018.06.080>
- 580 Connolly, A. C., Guntupalli, J. S., Gors, J., Hanke, M., Halchenko, Y. O., Wu, Y.-C., ... Haxby, J. V. (2012).  
581 The Representation of Biological Classes in the Human Brain. *The Journal of Neuroscience*, *32*(8),  
582 2608–2618. <https://doi.org/10.1523/JNEUROSCI.5547-11.2012>
- 583 Contini, E. W., Wardle, S. G., & Carlson, T. A. (2017). Decoding the time-course of object recognition in  
584 the human brain: From visual features to categorical decisions. *Neuropsychologia*, *105*, 165–176.  
585 <https://doi.org/10.1016/j.neuropsychologia.2017.02.013>
- 586 Crouzet, S. M., Kirchner, H., & Thorpe, S. J. (2010). Fast saccades toward faces: Face detection in just 100  
587 ms. *Journal of Vision*, *10*(4), 16. <https://doi.org/10.1167/10.4.16>
- 588 Delorme, A., & Makeig, S. (2004). EEGLAB: an open source toolbox for analysis of single-trial EEG  
589 dynamics including independent component analysis. *Journal of Neuroscience Methods*, *134*(1),  
590 9–21. <https://doi.org/10.1016/j.jneumeth.2003.10.009>
- 591 Dienes, Z. (2011). Bayesian Versus Orthodox Statistics: Which Side Are You On? *Perspectives on*  
592 *Psychological Science*, *6*(3), 274–290. <https://doi.org/10.1177/1745691611406920>
- 593 Grill-Spector, K., & Weiner, K. S. (2014). The functional architecture of the ventral temporal cortex and  
594 its role in categorization. *Nature Reviews Neuroscience*, *15*(8), 536–548.  
595 <https://doi.org/10.1038/nrn3747>
- 596 Grootswagers, T., Cichy, R. M., & Carlson, T. A. (2018). Finding decodable information that can be read  
597 out in behaviour. *NeuroImage*, *179*, 252–262.  
598 <https://doi.org/10.1016/j.neuroimage.2018.06.022>
- 599 Grootswagers, T., Ritchie, J. B., Wardle, S. G., Heathcote, A., & Carlson, T. A. (2017). Asymmetric  
600 Compression of Representational Space for Object Animacy Categorization under Degraded

- 601 Viewing Conditions. *Journal of Cognitive Neuroscience*, 29(12), 1995–2010.
- 602 [https://doi.org/10.1162/jocn\\_a\\_01177](https://doi.org/10.1162/jocn_a_01177)
- 603 Grootswagers, T., Wardle, S. G., & Carlson, T. A. (2017). Decoding Dynamic Brain Patterns from Evoked  
604 Responses: A Tutorial on Multivariate Pattern Analysis Applied to Time Series Neuroimaging  
605 Data. *Journal of Cognitive Neuroscience*, 29(4), 677–697. [https://doi.org/10.1162/jocn\\_a\\_01068](https://doi.org/10.1162/jocn_a_01068)
- 606 Haynes, J.-D. (2015). A Primer on Pattern-Based Approaches to fMRI: Principles, Pitfalls, and  
607 Perspectives. *Neuron*, 87(2), 257–270. <https://doi.org/10.1016/j.neuron.2015.05.025>
- 608 Jordan, M. C., Greene, M. R., Beck, D. M., & Fei-Fei, L. (2016). Typicality sharpens category  
609 representations in object-selective cortex. *NeuroImage*, 134, 170–179.  
610 <https://doi.org/10.1016/j.neuroimage.2016.04.012>
- 611 Isik, L., Meyers, E. M., Leibo, J. Z., & Poggio, T. (2014). The dynamics of invariant object recognition in  
612 the human visual system. *Journal of Neurophysiology*, 111(1), 91–102.  
613 <https://doi.org/10.1152/jn.00394.2013>
- 614 Jeffreys, H. (1998). *The theory of probability*. OUP Oxford.
- 615 Kaiser, D., Azzalini, D. C., & Peelen, M. V. (2016). Shape-independent object category responses revealed  
616 by MEG and fMRI decoding. *Journal of Neurophysiology*, 115(4), 2246–2250.  
617 <https://doi.org/10.1152/jn.01074.2015>
- 618 Kaneshiro, B., Guimaraes, M. P., Kim, H.-S., Norcia, A. M., & Suppes, P. (2015). A Representational  
619 Similarity Analysis of the Dynamics of Object Processing Using Single-Trial EEG Classification.  
620 *PLOS ONE*, 10(8), e0135697. <https://doi.org/10.1371/journal.pone.0135697>
- 621 Keyser, C., Xiao, D.-K., Földiák, P., & Perrett, D. I. (2001). The Speed of Sight. *Journal of Cognitive  
622 Neuroscience*, 13(1), 90–101. <https://doi.org/10.1162/089892901564199>
- 623 Kiani, R., Esteky, H., Mirpour, K., & Tanaka, K. (2007). Object Category Structure in Response Patterns of  
624 Neuronal Population in Monkey Inferior Temporal Cortex. *Journal of Neurophysiology*, 97(6),  
625 4296–4309. <https://doi.org/10.1152/jn.00024.2007>



- 626 King, J.-R., & Dehaene, S. (2014). Characterizing the dynamics of mental representations: the temporal  
627 generalization method. *Trends in Cognitive Sciences*, 18(4), 203–210.  
628 <https://doi.org/10.1016/j.tics.2014.01.002>
- 629 Konkle, T., & Caramazza, A. (2013). Tripartite Organization of the Ventral Stream by Animacy and Object  
630 Size. *Journal of Neuroscience*, 33(25), 10235–10242. [https://doi.org/10.1523/JNEUROSCI.0983-](https://doi.org/10.1523/JNEUROSCI.0983-13.2013)  
631 13.2013
- 632 Kriegeskorte, N., & Kievit, R. A. (2013). Representational geometry: integrating cognition, computation,  
633 and the brain. *Trends in Cognitive Sciences*, 17(8), 401–412.  
634 <https://doi.org/10.1016/j.tics.2013.06.007>
- 635 Kriegeskorte, N., Mur, M., & Bandettini, P. A. (2008). Representational Similarity Analysis - Connecting  
636 the Branches of Systems Neuroscience. *Frontiers in Systems Neuroscience*, 2, 4.  
637 <https://doi.org/10.3389/neuro.06.004.2008>
- 638 Kriegeskorte, N., Mur, M., Ruff, D. A., Kiani, R., Bodurka, J., Esteky, H., ... Bandettini, P. A. (2008).  
639 Matching Categorical Object Representations in Inferior Temporal Cortex of Man and Monkey.  
640 *Neuron*, 60(6), 1126–1141. <https://doi.org/10.1016/j.neuron.2008.10.043>
- 641 Long, B., Konkle, T., Cohen, M. A., & Alvarez, G. A. (2016). Mid-level perceptual features distinguish  
642 objects of different real-world sizes. *Journal of Experimental Psychology: General*, 145(1), 95.
- 643 Long, B., Yu, C.-P., & Konkle, T. (2017). A mid-level organization of the ventral stream. *BioRxiv*, 213934.  
644 <https://doi.org/10.1101/213934>
- 645 Maaten, L. van der, & Hinton, G. (2008). Visualizing Data using t-SNE. *Journal of Machine Learning*  
646 *Research*, 9(Nov), 2579–2605.
- 647 Macé, M. J.-M., Thorpe, S. J., & Fabre-Thorpe, M. (2005). Rapid categorization of achromatic natural  
648 scenes: how robust at very low contrasts? *European Journal of Neuroscience*, 21(7), 2007–2018.  
649 <https://doi.org/10.1111/j.1460-9568.2005.04029.x>

- 650 Mack, M. L., Gauthier, I., Sadr, J., & Palmeri, T. J. (2008). Object detection and basic-level categorization:  
651 Sometimes you know it is there before you know what it is. *Psychonomic Bulletin & Review*,  
652 15(1), 28–35. <https://doi.org/10.3758/PBR.15.1.28>
- 653 Mack, M. L., & Palmeri, T. J. (2011). The Timing of Visual Object Categorization. *Frontiers in Psychology*,  
654 2. <https://doi.org/10.3389/fpsyg.2011.00165>
- 655 Mack, M. L., & Palmeri, T. J. (2015). The Dynamics of Categorization: Unraveling Rapid Categorization.  
656 *Journal of Experimental Psychology: General*, No Pagination Specified.  
657 <https://doi.org/10.1037/a0039184>
- 658 Mahon, B. Z., & Caramazza, A. (2011). What drives the organization of object knowledge in the brain?  
659 *Trends in Cognitive Sciences*, 15(3), 97–103. <https://doi.org/10.1016/j.tics.2011.01.004>
- 660 Marti, S., & Dehaene, S. (2017). Discrete and continuous mechanisms of temporal selection in rapid  
661 visual streams. *Nature Communications*, 8(1), 1955. <https://doi.org/10.1038/s41467-017-02079->  
662 x
- 663 Meyers, E. M., Freedman, D. J., Kreiman, G., Miller, E. K., & Poggio, T. (2008). Dynamic Population  
664 Coding of Category Information in Inferior Temporal and Prefrontal Cortex. *Journal of*  
665 *Neurophysiology*, 100(3), 1407–1419. <https://doi.org/10.1152/jn.90248.2008>
- 666 Mohsenzadeh, Y., Qin, S., Cichy, R. M., & Pantazis, D. (2018). Ultra-Rapid serial visual presentation  
667 reveals dynamics of feedforward and feedback processes in the ventral visual pathway. *ELife*, 7,  
668 e36329. <https://doi.org/10.7554/eLife.36329>
- 669 Mur, M., Meys, M., Bodurka, J., Goebel, R., Bandettini, P. A., & Kriegeskorte, N. (2013). Human Object-  
670 Similarity Judgments Reflect and Transcend the Primate-IT Object Representation. *Frontiers in*  
671 *Psychology*, 4. <https://doi.org/10.3389/fpsyg.2013.00128>
- 672 Oostenveld, R., & Praamstra, P. (2001). The five percent electrode system for high-resolution EEG and  
673 ERP measurements. *Clinical Neurophysiology*, 112(4), 713–719. <https://doi.org/10.1016/S1388->  
674 2457(00)00527-7

- 675 Oosterhof, N. N., Connolly, A. C., & Haxby, J. V. (2016). CoSMoMVPA: Multi-Modal Multivariate Pattern  
676 Analysis of Neuroimaging Data in Matlab/GNU Octave. *Frontiers in Neuroinformatics, 10*.  
677 <https://doi.org/10.3389/fninf.2016.00027>
- 678 Peelen, M. V., & Caramazza, A. (2012). Conceptual Object Representations in Human Anterior Temporal  
679 Cortex. *Journal of Neuroscience, 32*(45), 15728–15736.  
680 <https://doi.org/10.1523/JNEUROSCI.1953-12.2012>
- 681 Posner, M. I., & Keele, S. W. (1968). On the genesis of abstract ideas. *Journal of Experimental*  
682 *Psychology, 77*(3p1), 353. <http://dx.doi.org/10.1037/h0025953>
- 683 Potter, M. C. (1975). Meaning in visual search. *Science, 187*(4180), 965–966.
- 684 Potter, M. C. (1976). Short-term conceptual memory for pictures. *Journal of Experimental Psychology:*  
685 *Human Learning and Memory, 2*(5), 509.
- 686 Potter, M. C., Wyble, B., Haggmann, C. E., & McCourt, E. S. (2014). Detecting meaning in RSVP at 13 ms  
687 per picture. *Attention, Perception, & Psychophysics, 76*(2), 270–279.
- 688 Proklova, D., Kaiser, D., & Peelen, M. (2017). MEG sensor patterns reflect perceptual but not categorical  
689 similarity of animate and inanimate objects. *BioRxiv, 238584*. <https://doi.org/10.1101/238584>
- 690 Proklova, D., Kaiser, D., & Peelen, M. V. (2016). Disentangling Representations of Object Shape and  
691 Object Category in Human Visual Cortex: The Animate–Inanimate Distinction. *Journal of*  
692 *Cognitive Neuroscience, 1*–13. [https://doi.org/10.1162/jocn\\_a\\_00924](https://doi.org/10.1162/jocn_a_00924)
- 693 Ritchie, J. B., Tovar, D. A., & Carlson, T. A. (2015). Emerging Object Representations in the Visual System  
694 Predict Reaction Times for Categorization. *PLoS Comput Biol, 11*(6), e1004316.  
695 <https://doi.org/10.1371/journal.pcbi.1004316>
- 696 Rosch, E. H. (1973). Natural categories. *Cognitive Psychology, 4*(3), 328–350.  
697 [https://doi.org/10.1016/0010-0285\(73\)90017-0](https://doi.org/10.1016/0010-0285(73)90017-0)
- 698 Rosch, E., & Mervis, C. B. (1975). Family resemblances: Studies in the internal structure of categories.  
699 *Cognitive Psychology, 7*(4), 573–605. [https://doi.org/10.1016/0010-0285\(75\)90024-9](https://doi.org/10.1016/0010-0285(75)90024-9)

- 700 Rossion, B., Torfs, K., Jacques, C., & Liu-Shuang, J. (2015). Fast periodic presentation of natural images  
701 reveals a robust face-selective electrophysiological response in the human brain. *Journal of*  
702 *Vision, 15*(1), 18–18. <https://doi.org/10.1167/15.1.18>
- 703 Rouder, J. N., Speckman, P. L., Sun, D., Morey, R. D., & Iverson, G. (2009). Bayesian t tests for accepting  
704 and rejecting the null hypothesis. *Psychonomic Bulletin & Review, 16*(2), 225–237.
- 705 Rousselet, G. A., Fabre-Thorpe, M., & Thorpe, S. J. (2002). Parallel processing in high-level categorization  
706 of natural images. *Nature Neuroscience, 5*(7), 629–630. <https://doi.org/10.1038/nn866>
- 707 Sergent, C., Baillet, S., & Dehaene, S. (2005). Timing of the brain events underlying access to  
708 consciousness during the attentional blink. *Nature Neuroscience, 8*(10), 1391.
- 709 Sha, L., Haxby, J. V., Abdi, H., Guntupalli, J. S., Oosterhof, N. N., Halchenko, Y. O., & Connolly, A. C.  
710 (2015). The Animacy Continuum in the Human Ventral Vision Pathway. *Journal of Cognitive*  
711 *Neuroscience, 27*(4), 665–678. [https://doi.org/10.1162/jocn\\_a\\_00733](https://doi.org/10.1162/jocn_a_00733)
- 712 Simanova, I., van Gerven, M., Oostenveld, R., & Hagoort, P. (2010). Identifying Object Categories from  
713 Event-Related EEG: Toward Decoding of Conceptual Representations. *PLoS ONE, 5*(12), e14465.  
714 <https://doi.org/10.1371/journal.pone.0014465>
- 715 Teichmann, L., Grootswagers, T., Carlson, T., & Rich, A. N. (2018). Decoding Digits and Dice with  
716 Magnetoencephalography: Evidence for a Shared Representation of Magnitude. *Journal of*  
717 *Cognitive Neuroscience, 30*(7), 999–1010. [https://doi.org/10.1162/jocn\\_a\\_01257](https://doi.org/10.1162/jocn_a_01257)
- 718 Thorpe, S., Fize, D., & Marlot, C. (1996). Speed of processing in the human visual system. *Nature,*  
719 *381*(6582), 520–522. <https://doi.org/doi:10.1038/381520a0>
- 720 VanRullen, R., & Thorpe, S. J. (2001). The Time Course of Visual Processing: From Early Perception to  
721 Decision-Making. *Journal of Cognitive Neuroscience, 13*(4), 454–461.  
722 <https://doi.org/10.1162/08989290152001880>
- 723 Wagenmakers, E.-J. (2007). A practical solution to the pervasive problems of p values. *Psychonomic*  
724 *Bulletin & Review, 14*(5), 779–804. <https://doi.org/10.3758/BF03194105>

- 725 Wardle, S. G., Kriegeskorte, N., Grootswagers, T., Khaligh-Razavi, S.-M., & Carlson, T. A. (2016).  
726 Perceptual similarity of visual patterns predicts dynamic neural activation patterns measured  
727 with MEG. *NeuroImage*, *132*, 59–70. <https://doi.org/10.1016/j.neuroimage.2016.02.019>
- 728 Wetzels, R., Matzke, D., Lee, M. D., Rouder, J. N., Iverson, G. J., & Wagenmakers, E.-J. (2011). Statistical  
729 Evidence in Experimental Psychology: An Empirical Comparison Using 855 t Tests. *Perspectives*  
730 *on Psychological Science*, *6*(3), 291–298. <https://doi.org/10.1177/1745691611406923>
- 731
